1 **Endothelial Semaphorin 3fb regulates Vegf pathway-mediated angiogenic sprouting.**

2 Charlene Watterston<sup>1</sup>, Rami Halabi<sup>2</sup>, Sarah McFarlane<sup>2</sup>, and Sarah J Childs<sup>1</sup> †

3

4 1) Department of Biochemistry and Molecular Biology, Alberta Children's Hospital Research Institute,  
5 University of Calgary, 3330 Hospital Dr., NW, Calgary, AB, Canada T2N 4N1

6 2) Department of Cell Biology and Anatomy, Hotchkiss Brain Institute, Alberta Children's Hospital  
7 Research Institute, University of Calgary, 3330 Hospital Dr. NW, Calgary, AB, Canada T2N 4N1

8

9 † **Corresponding author**

10 Email: [schild@ucalgary.ca](mailto:schild@ucalgary.ca)

11

12 **ORCID IDs:**

13 Charlene Watterston: 0000-0002-7603-1837

14 Rami Halabi: 0000-0003-3160-3552

15 Sarah McFarlane: 0000-0001-9880-9980

16 Sarah Childs: 0000-0003-2261-580X

17

18

19 **Keywords:** Semaphorin, VEGF, intersegmental vessel, zebrafish

20 **Abstract:**

21 Vessel growth integrates diverse extrinsic signals with intrinsic signaling cascades to coordinate cell  
22 migration and sprouting morphogenesis. The pro-angiogenic effects of Vascular Endothelial Growth  
23 Factor (VEGF) are carefully controlled during sprouting to generate an efficiently patterned vascular  
24 network. We identify crosstalk between VEGF signaling and that of the secreted ligand Semaphorin  
25 3fb (Sema3fb), one of two zebrafish paralogs of mammalian Sema3F. The *sema3fb* gene is  
26 expressed by endothelial cells in actively sprouting vessels. Loss of *sema3fb* results in abnormally  
27 wide and stunted intersegmental vessel artery sprouts. Although the sprouts initiate at the correct  
28 developmental time, they have a reduced migration speed. These sprouts have persistent filopodia  
29 and abnormally spaced nuclei suggesting dysregulated control of actin assembly. *sema3fb* mutants  
30 show simultaneously higher expression of pro-angiogenic (*VEGF receptor 2 (vegfr2)* and *delta-like 4*  
31 (*dll4*)) and anti-angiogenic (soluble *VEGF receptor 1 (svegfr1)*/ *soluble Fms Related Receptor*  
32 *Tyrosine Kinase 1 (sflt1)*) pathway components. We show increased phospho-ERK staining in  
33 migrating angioblasts, consistent with enhanced Vegf activity. Reducing Vegfr2 kinase activity in  
34 *sema3fb* mutants rescues angiogenic sprouting. Our data suggest that Sema3fb plays a critical role in  
35 promoting endothelial sprouting through modulating the VEGF signaling pathway, acting as an  
36 autocrine cue that modulates intrinsic growth factor signaling.

37

38

39 **Author summary:**

40 To supply tissues with essential oxygen and nutrients, blood vessel development is carefully  
41 orchestrated by positive ‘go’ and negative ‘stop’ growth signals as well as directional cues to shape  
42 patterning. Semaphorin proteins are named after the ‘Semaphore’ railway signaling system that  
43 directed trains along the appropriate tracks. Our work highlights the role of the Semaphorin 3fb protein  
44 in providing a pro-growth signal to developing vessels. Semaphorin 3fb is both produced by, and acts  
45 on the precursors of blood vessels as they migrate, a process known as autocrine control. We find that

46 losing Semaphorin 3fb leads to stalled blood vessel growth, indicating it normally acts as a positive  
47 signal. It acts via modulating the VEGF growth factor signaling pathway that in turn, controls the  
48 migration process. We propose that Semaphorin3b fine-tunes vessel growth, thus ensuring a properly  
49 patterned network develops.

50

51

52

### 53 **Introduction:**

54 Sprouting angiogenesis is a process by which new vessels branch and grow from existing vessels,  
55 establishing the perfusion of tissues and organs. How sprouting angiogenesis is coordinated at the  
56 intrinsic and extrinsic levels is one of the most important questions in vascular biology. Vessel growth  
57 is highly dependent on Vascular Endothelial Growth Factor (VEGF) signaling, which functions as a  
58 master regulator to promote angiogenesis, and is often dysregulated in disease [1–4]. VEGF gradients  
59 within tissues are responsible for the initial triggering and guidance of the sprouting process signaling  
60 through the endothelial-expressed tyrosine kinase VEGF receptor 2 (VEGFR2) [5–7], activating  
61 downstream signaling including that of the MAPK-ERK pathway. The cellular response to VEGF must  
62 be carefully regulated to ensure the stereotypical patterning of vessels.

63

64 During sprout formation, angioblasts adopt two distinct cellular states – termed tip and stalk-  
65 that respond to internal and external stimuli to promote and guide vessel growth [5, 8, 9]. Tip cells  
66 utilize filopodia to scan the environment for attractive and repulsive cues that dynamically control  
67 proliferation and migration [10, 11]. In contrast, trailing stalk cells have limited filopodia, are quiescent,  
68 and contribute to forming the vascular lumen and phalanx [5, 12]. Tip and stalk identity are determined  
69 competitively through a Delta-like 4 (DII4)-Notch lateral inhibition pathway and VEGF signaling  
70 feedback loop. DII4 expression is induced downstream of VEGF signaling in tip cells [13]. DII4 positive  
71 cells activate the Notch receptor in stalk cells [14–16] to down-regulate VEGF receptor expression and  
72 limit the response of the stalk cell to environmental VEGF [17–19].

73

74           The vertebrate-specific secreted Class 3 Semaphorins (Sema3s) including Sema3a, Sema3c,  
75 and Sema3f typically act as repulsive guidance cues to limit vessel growth. Sema3 control of  
76 angiogenesis is evolutionarily conserved across multiple species [20–23]. The exact role of these  
77 instructive cues can differ depending on the species and tissue expression of ligands and/or receptors.  
78 PlexinD1 is an endothelial-specific receptor conserved in zebrafish and mouse and integrates signals  
79 from multiple Sema3 ligands. During embryonic vessel growth, zebrafish Sema3a is expressed in a  
80 caudal-to-rostral gradient across each somite. Paracrine signaling from Sema3a to its receptor  
81 PlexinD1 in the endothelium acts to spatially restrict intersegmental vessels [22]. In mouse Sema3E  
82 guides intersegmental vessel growth via PlexinD1 [20, 24]. In contrast, fish Sema3e shows endothelial  
83 expression and acts as an autocrine pro-angiogenic factor to antagonize PlexinD1 during  
84 intersegmental vessel growth [25]. PlexinD1 also limits responses to VEGF by increasing the  
85 expression of a soluble decoy Vegf receptor (sVegfr2/sFlt1) [26]. sFlt1 antagonizes Vegfr2 signaling  
86 by sequestering Vegf ligand thus providing a link between Sema-Plexin and Vegf signaling.

87

88           Sema3F is highly expressed by cultured human and mouse endothelial cells [27–30] and in  
89 endothelial cells in scRNAseq databases [31, 32]. SEMA3F typically signals through Neuropilin  
90 receptors (NRP) to modulate migration in cell culture models [30, 33]. Exogenous human SEMA3F  
91 inhibits tumor progression and vascularization [21]. However, SEMA3F has a versatile role in  
92 regulating vessel growth depending on context; it functions either as a pro-angiogenic or anti-  
93 angiogenic cue. For instance, exogenously applied Sema3F limits aberrant growth of mouse retinal  
94 vessels [34], and we recently showed similar anti-angiogenic functions for *sema3fa* in the zebrafish  
95 retina [35]. At the same time, Sema3F is pro-angiogenic during placental development in mice [29,  
96 36]. There is still a limited understanding of how an endothelial cell can receive the same signal, yet  
97 coordinate different downstream molecular pathways driving angiogenic growth. Context-dependent  
98 and tissue specific expression can further influence cell behaviors, for example in the mouse brain

99   Sema3E/PlexinD1 signaling switches from attractive to repulsive depending on NRP co-receptor  
100   expression [37].

101

102   Here we investigate the role of zebrafish *Sema3f* in regulating angiogenic growth. We find that  
103   *sema3fb* is expressed within endothelial cells of the dorsal aorta and is necessary for promoting sprout  
104   migration in the trunk. We show that *sema3fb* regulates the expression of the VEGF receptor *vegfr2* to  
105   promote angioblast migration, as well as regulating the expression of genes mediating feedback on  
106   Vegf signaling such as *sflt1* and *dll4*. Together these data reveal a new autocrine role for a secreted  
107   ligand from endothelial cells in modulating VEGF pathway activity in angiogenic sprouting.

108

109

## 110   **Results:**

111

### 112   ***sema3fb* is expressed by developing blood vessels**

113       To investigate the role of Sema3F in vascular angiogenesis, we use zebrafish. The zebrafish  
114   genome contains duplicated orthologs of human *SEMA3F* - *sema3fa* and *sema3fb* [38]. The  
115   stereotypic patterning of major trunk vessels in the zebrafish begins at around 20 hours post  
116   fertilization (hpf) when angioblasts (endothelial precursors) migrate collectively from the dorsal aorta  
117   (DA) and sprout laterally in between each pair of somites to form the intersegmental arteries (ISAs).  
118   The ISAs then migrate dorsally and connect to form the dorsal longitudinal vessel (DLAV) between 30-  
119   32 hpf [39]. Using whole mount in situ hybridization (ISH), we analyzed the expression of *sema3fa* and  
120   *sema3fb* and find non-overlapping patterns of expression in the trunk of developing embryos. *sema3fb*  
121   is expressed in the dorsal aorta at 26 hpf and in ISAs by 28 -30 hpf (Fig 1A, S1 Fig), similar to the  
122   endothelial expression pattern of *sema3e* [25]. In contrast, its homolog *sema3fa* is absent from the  
123   trunk endothelium and is expressed laterally in somites (S1 Fig). These expression patterns are  
124   consistent with published zebrafish single-cell sequencing data showing expression of *sema3fb* (but  
125   not *sema3fa*) in *pecam*, *tie1*, and *flt1*-expressing endothelial cells of developing zebrafish embryos

126 [40]. Endothelial expression of *Sema3f* in murine and human and of *sema3fb* in zebrafish vasculature  
127 is supportive of the conserved role for *Sema3f* in endothelial cells.

128

### 129 **Loss of *sema3fb* results in angiogenic deficits**

130 To investigate the endogenous role of *Sema3fb* in regulating vessel growth in an intact animal,  
131 we used the *sema3fb*<sup>ca305</sup> CRISPR mutant with a 19 base pair deletion in exon1 that is predicted to  
132 produce a premature truncated protein (32 amino acids in length), deleting most of the *Sema* domain  
133 which is necessary for intracellular signaling [41, 42]. To visualize real-time vascular development, we  
134 crossed *sema3fb*<sup>ca305</sup> loss of function mutants to *Tg(kdr1:mCherry)*<sup>ci5</sup> transgenic fish that fluorescently  
135 mark endothelial cells, and generated wild type, heterozygote, and mutant siblings. We analyzed  
136 angiogenic sprouting at 30hpf when ISA sprouts first connect to form the DLAV (Fig 1B) and observed  
137 angiogenic deficits in both *sema3fb*<sup>ca305/+</sup> heterozygotes (Fig 1D) and *sema3fb*<sup>ca305</sup> homozygous  
138 mutants (Fig 1E) as compared to wild type siblings (Fig 1C). Specifically, we note a significant  
139 reduction in the average length of the ISA sprouts at 30 hpf from 106  $\mu$ m in wild type to 91  $\mu$ m and 92  
140  $\mu$ m in heterozygote and homozygote mutant embryos, respectively (Fig 1F). Second, the percentage  
141 of ISAs connected at the DLAV is reduced from 80% in wild type to 50% in heterozygote and 40% in  
142 homozygote mutants (Fig 1G). Lastly, ventral sprout diameter is increased from 7  $\mu$ m in wild type to  
143 8.5  $\mu$ m in heterozygotes and 9  $\mu$ m in homozygotes (Fig 1H). These data suggest *Sema3fb* normally  
144 promotes angiogenic migration, resulting in stunted wider sprouts when lost.

145

146 We observed that losing a single mutated allele of *sema3fb* results in highly penetrant vascular  
147 defects in the developing trunk, with a similar magnitude to homozygous loss of the gene. This could  
148 result if the loss of function of *sema3fb* is haploinsufficient. To induce a loss of function by an  
149 independent method, we injected 1-cell stage embryos with 1ng of a validated morpholino antisense  
150 oligonucleotide (morpholino, MO) against *sema3fb* [43]. *sema3fb* morphants have an identical  
151 phenotype to *sema3fb*<sup>ca305</sup> mutants at 30 hpf, with no additional defects in morpholino-injected  
152 *sema3fb*<sup>ca305</sup> mutants suggesting that the *sema3fb* mutant is a loss of function allele (S1 Fig). As a

153 note, haploinsufficiency is also observed for members of the Vegf pathway including the Vegf and Dll4  
154 genes, both critical for angiogenesis.

155

156 As the *sema3fb* paralog *sema3fa* is not expressed in trunk vasculature (S1 Fig), we did not  
157 expect the loss of *sema3fa* to affect ISA growth. Indeed, *sema3fa*<sup>ca304</sup> mutants display normal  
158 sprouting and connections (S1 Fig). There also does not appear to be genetic compensation by  
159 *sema3fa*, as *sema3fa*<sup>ca304</sup> mutants injected with *sema3fb* morpholino show no additional defects over  
160 *sema3fb*<sup>ca305</sup> mutants or morphants (S1 Fig). These results suggest that only one of the two zebrafish  
161 *Sema3f* orthologs, *sema3fb*, regulates angiogenic sprouting in the trunk at this developmental stage.

162

163 Despite Semaphorin involvement in axon and angioblast guidance in other systems, we find no  
164 significant changes in sprout direction between *sema3fb* heterozygotes or homozygous mutants as  
165 observed by the position of sprouts with reference to laminin staining at the myotendinous junctions  
166 that separate somites (S2 Fig). Like other angiogenic mutants with stalled migration [44], *sema3fb*  
167 mutant vessels eventually recover, likely through compensation by unknown genes and pathways,  
168 with no noticeable differences in vessel patterning at 48 hpf (S3 Fig).

169

170 We did not expect blood flow to contribute to *sema3fb* mutant ISA phenotypes as the migration  
171 of cells forming primary ISAs between 20-30 hpf occurs independently of blood flow [45, 46]. However,  
172 as *sema3fb*<sup>ca305</sup> mutants have a heart function defect [41] we next tested whether there were effects of  
173 blood flow on the phenotype. We injected 1ng of a commonly used translation blocking morpholino  
174 against cardiac *troponin 2a* (*tnnt2a*MO; [47]) in wild type and *sema3fb* mutants at the one-cell stage,  
175 to limit heart contractility and blood flow. In *tnnt2* MO-injected wildtypes, ISA growth is unaffected by  
176 the loss of blood flow as previously reported. Similarly, there is no significant difference in vessel  
177 growth or numbers of connections in the *tnnt2a* MO-injected *sema3fb* mutants as compared to their  
178 uninjected counterparts (S2 Fig). These data demonstrate the angiogenic defects in *sema3fb* mutants  
179 at 30 hpf are not a result of modified blood flow. We note that uninjected *sema3fb*<sup>ca305</sup> fish show a

180 reduction in the DA diameter (S2 Fig), an effect also seen in *tnnt2a* morphants. This suggests that  
181 axial vessel diameter is sensitive to cardiac output at early time points while sprouting angiogenesis is  
182 not. Thus, our data to this point suggest that *Sema3fb* normally promotes ISA sprouting from the  
183 dorsal aorta, with no apparent role in spatial guidance.

184

### 185 **Loss of *sema3fb* disrupts ISA migration and endothelial nuclei morphology.**

186 The stunted morphology of *sema3fb*<sup>ca30</sup> ISA vessels at 30 hpf suggests there might be delays  
187 in EC sprout initiation and/or migration. To examine whether these are impacted by the loss of  
188 *Sema3fb*, we crossed *sema3fb*<sup>ca305</sup> *Tg(kdrl:mCherry)* fish to the *Tg(fli1a:nEGFP)* line, which labels  
189 endothelial nuclei (Fig 2A). Using time-lapse confocal imaging we tracked ISA vessel elongation  
190 between wild type and *sema3fb*<sup>ca305</sup> embryos from 25 – 29 hpf (Fig 2 A and B). We find no significant  
191 difference in sprout initiation from 25.0 – 25.5 hpf in either wild type or *sema3fb*<sup>ca305</sup> mutant ISAs, both  
192 having an average length of 54  $\mu\text{m}$ . However, as sprouts begin to elongate, the average ISA migration  
193 distance for mutants starts to fall behind wild type distances by 26.5 hpf and vessels are shorter at all  
194 subsequent time points analyzed, with an average 5- 9  $\mu\text{m}$  difference in length between wild type and  
195 mutant (Fig 2B, S1 Table). ISA angioblast migration speed from 25-26 hpf averages 0.21  $\mu\text{m}/\text{min}$  (S4  
196 Fig) and slows to 0.15  $\mu\text{m}/\text{min}$  between 26-27 hpf (Fig 2C) before increasing to 0.19  $\mu\text{m}/\text{min}$  by 27-28  
197 hpf (Fig 2D) and continues at 0.16  $\mu\text{m}/\text{min}$  between 28-29 hpf (Fig 2E). In contrast, the average rate of  
198 migration for *sema3fb*<sup>ca305</sup> vessels is significantly reduced to an average of 0.12 – 0.13  $\mu\text{m}/\text{min}$  from 25-  
199 28 hpf when compared to wild type (Fig 2 C-D and S4 Fig). We also measured the lead angioblast (tip  
200 cell) distance from the DA at hourly intervals as a measure of EC motility and similarly find no  
201 difference in the distance traveled between wild type and mutant vessels at 25 - 26 hpf (S4 Fig). There  
202 is a significant difference by 27hpf (Fig 2 F – H), with an average distance traveled of 55  $\mu\text{m}$  for wild  
203 type at 27 hpf (Fig 2F) to 70  $\mu\text{m}$  at 28 hpf (Fig 2G), while mutants only reach 47  $\mu\text{m}$  and 55  $\mu\text{m}$   
204 respectively. By 29 hpf mutants migrate an average of 69  $\mu\text{m}$  from the DA whereas wildtype  
205 angioblasts migrate significantly further and reach 85  $\mu\text{m}$  (Fig 2H). Together these data suggest that  
206 sprout initiation is normal, but angioblast movement is significantly delayed with loss of



207 *sema3fb*. Alongside the stunted morphology, we observed that loss of *sema3fb* resulted in wider  
208 vessels (Fig 1 H). Previous studies in zebrafish have linked increased ISA width to changes in EC  
209 proliferation [48–50]. To determine whether changes in cell number could account for the change in  
210 vessel diameter, we assayed ISA sprout formation in the *Tg(kdrl:mCherry) ;(fli1a:nEGFP)* lines (Fig  
211 2I). ISA growth follows a stereotypic series of angioblast movements initiated by the migration of an  
212 angioblast tip cell from the dorsal aorta followed by a second trailing stalk cell. Once the leading  
213 angioblast reaches the horizontal myoseptum, it typically divides and a single daughter cell migrates  
214 dorsally to form the DLAV [25, 51, 52]. This process results in an average of 3-4 endothelial cell nuclei  
215 per ISA sprout (Fig 2B). *sema3fb*<sup>ca305</sup> mutants and heterozygotes have a similar number of endothelial  
216 cells per vessel as wild type animals (Fig 2J). *sema3fb* morphants also have the same number of  
217 endothelial nuclei per vessel as wild type (S4 Fig), suggesting that loss of *sema3fb* does not affect  
218 endothelial cell number.

219

220 Analysis of the distance between endothelial nuclei, however, revealed a significant decrease  
221 in the spacing between endothelial cell nuclei in *sema3fb* mutants (Fig 2I and K). Reduced spacing  
222 gives the appearance of nuclear clumps. Clump location below the horizontal myoseptum correlates  
223 with an increased width of ISAs (Fig 1H). We also find that endothelial nuclei are significantly larger in  
224 mutants than in wild type controls, increased from an average of 49  $\mu\text{m}^2$  in wild type to 60  $\mu\text{m}^2$   
225 heterozygous and homozygous mutants (Fig 2L). The increase in nuclear size is also observed in  
226 *sema3fb* morphants (S4 Fig). Taken together, this data suggests that *sema3fb* mutant sprouts have  
227 the correct number of cells, can migrate along the correct path, but do not migrate as far as wild type  
228 sprouts. By 30hpf, stalled growth disrupts ISA elongation resulting in aberrant cell and nuclear  
229 morphology.

230

### 231 ***sema3fb* mutants display persistent filopodia.**

232 As Sema3F signaling controls actin dynamics, we reasoned that angioblast migration defects  
233 might also be accompanied by a change in filopodia activity. As ISAs begin to connect by 28 hpf,

234 through a process termed anastomosis, actin-rich filopodia projections resolve to allow stable vessel  
235 connections forming a patent DLAV. In *sema3fb*<sup>ca305</sup> mutants, a small proportion of ISAs can reach  
236 and connect to form the DLAV by 30 hpf (Fig 1 G). To assay whether loss of *sema3fb* can impact the  
237 vessel connection process, we injected wild type and *sema3fb*<sup>ca305</sup> mutants with an endothelial-specific  
238 F-actin reporter, *Tol2(fli1<sup>ep</sup>Lifeact-EGFP)*, in which filamentous actin (F-actin), a major component of  
239 the cytoskeleton, is labeled with GFP to visualize filopodia on migrating endothelial cells (Fig 3A, S5  
240 Fig). We selected GFP positive ISA sprouts that have reached the level of the DLAV, and assayed  
241 filopodia above the horizontal myoseptum but below the DLAV (S5 Fig) to capture filopodia projections  
242 along the upper segment of each ISA. These filopodia should rapidly disappear once the ISV is  
243 connected from around 28 hpf. Time-lapse confocal imaging of mosaically labeled sprouts from 28-30  
244 hpf in stage-matched embryos revealed that wild type sprouts have filopodia when they first reach the  
245 DLAV but filopodial numbers gradually reduce over time as the cells lumenize and become quiescent  
246 once connected to neighboring vessels (Fig 3B; S5 Fig). At 28hpf, wild type and *sema3fb* mutants  
247 have the same number of filopodia per ISA (average of 9 filopodia). By 29hpf, wild type sprouts have  
248 an average of 5 filopodia, while *sema3fb* mutants have 7. By 30hpf, there is an average of 3 filopodia  
249 remaining in wild type, while *sema3fb* mutants maintain comparable numbers to the earlier time points  
250 (Fig 3B, C). These data suggest that in the few sprouts of *sema3fb* mutants that reach the DLAV, cells  
251 fail to restrict filopodia formation at the appropriate time.

252

### 253 **VEGF signaling is altered in *sema3fb* mutants**

254 To investigate the molecular mechanisms controlling migration downstream of *sema3fb* we assayed  
255 gene expression in FACS-sorted *Tg(kdrl:mCherry)* wildtype and *sema3fb* mutant endothelial cells by  
256 Taqman RT-qPCR. We analyzed the expression of a key set of endothelial cell markers that regulate  
257 angiogenic sprouting (Fig 4A inset and S6 Fig). Analysis of FACS-sorted endothelial cells reveals a  
258 4.3-fold increase in *vegfr2/kdrl* and a 2.3-fold increase in *dll4* in *sema3fb* mutant endothelial cells as  
259 compared to controls. Comparison of the fluorescence intensity of transgenic *Tg(kdrl:mCherry)* also  
260 revealed a significant increase in mCherry fluorescence in live *sema3fb*<sup>ca305</sup> mutants (S6 Fig). We find

261 no significant difference in *notch2* or *jagged1a* or the *vegfr2* ligand *vegfab* expression (Fig 4A).  
262 Surprisingly, we also find a significant near 3-fold increase in the expression of the decoy receptor  
263 *soluble vegfr1/soluble flt1 (sflt1)* in mutants as compared to controls (Fig 4B). As an independent  
264 experiment, we confirmed upregulated *vegfr2* and *sflt1* expression in mutants using quantitative  
265 fluorescent ISH (FISH) (Fig 4B and C). We next assayed the expression of Phospho-ERK (pERK), a  
266 downstream effector of VEGF signaling in vascular sprouting. Although there is no difference in the  
267 number of ISAs with a positive pERK signal between wildtype and mutant (Fig 4 D and E), we find that  
268 there is a significant increase in fluorescent intensity of pERK positive EC nuclei in mutant ISV  
269 angioblasts (Fig 4 D and F), which is supportive of increased *Vegfr2* pathway activity in ECs (Fig 4D-  
270 E). These data suggest the loss of *Sema3fb* results in upregulation of both VEGF-pathway promoting  
271 (*vegfr2/dll4*) and VEGF-inhibiting (*sflt1*) genes in endothelial cells, which could account for disrupted  
272 angioblast migration.

273 To test whether the angiogenic defects in *sema3fb* mutants are the result of increased *Vegfr2*  
274 activity, we treated wild type and *sema3fb* mutant embryos with 0.5  $\mu$ M SU5416, a selective *Vegfr2*  
275 inhibitor, from 20-30 hpf (Fig 4G). Inhibitor-treated wild type embryos have stunted sprouts as reported  
276 (104  $\mu$ m in untreated wildtype vs. 50  $\mu$ m in treated wild type embryos), but *sema3fb* mutants are  
277 unaffected with no significant changes in sprout length (average length 82  $\mu$ m in both treated and  
278 untreated mutants; S6 Fig). This suggests that increased *vegfr2* expression in *sema3fb* mutants  
279 renders them less sensitive to pharmacological *Vegfr2* inhibition as compared to wild type embryos.  
280 However, we reasoned that this inhibitor dose severely disrupts VEGF signaling and vessel growth  
281 and may mask more subtle changes in sprout dynamics. Therefore, we lowered the SU5416  
282 concentration to a sub-optimal dose that others have used (low-dose: 0.2 $\mu$ M SU5416) to induce  
283 minimal angiogenic deficits (Fig 4H) [54]. As expected, in wild type embryos low-dose treatment  
284 results in a mild reduction in sprout length from 104  $\mu$ m to 92  $\mu$ m and a 60% decrease in the number  
285 of ISA connections to the DLAV (Fig 4I, J). However, in *sema3fb* mutants, sub-optimal *Vegf* inhibition  
286 significantly rescues *sema3fb* mutant defects. The length of ISAs in treated *sema3fb* mutants  
287 increases to 98  $\mu$ m from an average of 85  $\mu$ m in untreated mutants, restoring them to an ISA length

288 indistinguishable from wildtype (Fig 4 I). Connections at the DLAV are also significantly increased from  
289 46% in untreated mutants to 73% in treated embryos, which is comparable to untreated wild types and  
290 significantly increased beyond treated wildtypes. (Fig 4J). We also applied a second VEGF inhibitor,  
291 DMH4 at a low dose to partially block ISA growth [55, 56]. Similar to SU4516 treatment, wild type  
292 vessels have decreased in length following treatment with DMH4. Interestingly, although treatment  
293 with 15  $\mu$ M or 25  $\mu$ M DMH4 also reduces vessel length in *sema3fb* mutants, ISAs are still able to  
294 sprout an average 23  $\mu$ m or 35  $\mu$ m further than the treated wild type vessels, at each dose  
295 respectively (S6 Fig). Thus, slight reductions in Vegfr2 activity can restore *sema3fb* endothelial  
296 migration. Our data shows that the increase in *vegfr2* expression in *sema3fb* mutants has functional  
297 consequences on sprout migration.

298

299

## 300 **Discussion:**

301

302 Vegf activity must be tightly regulated during embryonic development and homeostasis [18,  
303 57–60]. This control is exquisite, and the zebrafish model has uncovered many regulatory layers of  
304 Vegfr2 pathway activity in endothelial cells [14, 48, 61]. Here we find that *sema3fb* offers an additional  
305 layer of control to VEGF signaling. Zebrafish *sema3fb* mRNA is expressed by developing trunk  
306 angioblasts. Loss of *sema3fb* stalls vessel migration and disrupts ISA morphology, resulting in wider  
307 and shorter ISAs in which nuclei are clumped and larger. Expression analysis revealed upregulation of  
308 *vegfr2* and *dll4* and a significant increase in pERK staining intensity in mutant endothelial cells. We  
309 also observed upregulation of an inhibitory molecule *svegfr1/sflt1* in mutant endothelium, suggesting  
310 *sema3fb* signaling also normally represses *sflt1* expression. Taken together, our results from an intact  
311 animal model suggest *Sema3fb* acts in an autocrine manner to regulate Vegf-mediated angiogenesis  
312 (Model; Fig 5).

313

314 In cultured endothelial cells, the anti-angiogenic effects of SEMA3F are primarily mediated  
315 through competitive binding of SEMA3F to NRP2 to antagonize VEGF-induced proliferation and  
316 migration, as observed in both cultured human umbilical vein endothelial cells (HUVECs) [62, 63] and  
317 porcine aortic endothelial cells [64]. The SEMA3F-NRP pathway generally also opposes VEGF activity  
318 in tumor models, where a loss of SEMA3F leads to gross vessel overgrowth [29, 64]. However, in our  
319 intact zebrafish *sema3fb* loss of function model, we were surprised to find reduced vessel growth  
320 despite upregulation of the *vegfr2* gene and an increase in Vegfr2 activity. We find that inhibiting  
321 VEGF signaling rescued endothelial migration, suggesting that upregulation of Vegf signaling  
322 contributes to the observed phenotype. Intriguingly, the stunted sprout morphology of *sema3fb*  
323 mutants is also reflective of the phenotype reported for a gain of function for the inhibitory molecule  
324 *sflt1* [59]. Plexin-Semaphorin signaling is complex, with multiple co-expressed ligands and receptors  
325 present in cells that can mediate either additive or opposing effects. The Plexin receptor for Sema3f in  
326 zebrafish is not yet known, but in cell culture, Sema3F binds to PlexinA family receptors. PlexinD1 is a  
327 major endothelial cell receptor for other Sema3's (Sema3A, Sema3E) in mouse and has an exuberant  
328 angiogenic sprouting phenotype when lost. The fish *sema3fb* mutant phenotype appears opposite to  
329 that of *plexind1* loss of function [22, 52]. Further, both *sema3fb* and *plexind1* regulate the expression  
330 of the decoy receptor *sflt1*, but in opposing, directions, suggesting their signaling has opposing action  
331 on common downstream pathways to fine-tune angiogenesis.

332

333 Increases in VEGF activity are reported to paradoxically increase both pro-angiogenic  
334 signaling via Dll4 as well as the expression of anti-angiogenic molecules such as sFlt1 in cell culture  
335 models [53]. Where excessive VEGFR-2 stimulation is reported to increase sFLT1 expression in  
336 HUVECs to limit inappropriate vessel growth [53, 65]. If this feedback regulation is also at play in  
337 zebrafish, reducing excessive Vegfr2 activity in *sema3fb* mutants would be expected to decrease  
338 levels of sFlt1, thus allowing sprouting to occur. It is not obvious from the results of our expression  
339 analysis whether the stalled vessel phenotype occurs from an increase in Vegf signaling (upregulated  
340 *vegfr2* and pERK) or inhibited Vegf signaling (increased *sflt1*). Although we demonstrate that reducing

341 Vegf signaling rescues the angioblast migration defect, we lack the tools to test protein levels of sFlt1,  
342 which might have distinct regulation, apart from the mRNA levels we could measure here. The sFlt1  
343 protein might contribute to our observed phenotype in ways that we cannot assess *in vivo*. For  
344 instance, the relative abundance of ligands (Sema3f), receptors (Nrp and Plexin), and co-receptor  
345 (Nrp2, note this is also a Vegfr2 co-receptor) present in a sprouting endothelial cell may influence  
346 intrinsic signaling responses. Increased *sflt1* mRNA may result in increased sFlt1 protein expression  
347 downstream of Vegfr2 upregulation, similar to what is observed in HUVEC cells [65]. However,  
348 increased mRNA may not result in increased protein, and protein subcellular localization may also  
349 play a role in the signaling. For instance, Vegf directly controls the expression of PlexinD1 to spatially  
350 restrict endothelial tip cell responses to Sema3e in retinal murine models [24]. Further, in cell culture  
351 models, there is higher SEMA3F expression on the leading edge of the cell that may influence  
352 directional tip cell migration of HUVECs [62, 66].

353

354 Semaphorins traditionally play guidance roles to control vessel patterning. Interestingly, loss of  
355 Sema3fb does not affect spatial guidance during early angiogenesis. This either suggests that Sema3f  
356 signals through a different receptor or is one of several ligands of PlexinD1 in zebrafish, with other  
357 ligands conveying spatial guidance information. Indeed the synergy between Sema3A and Sema3F in  
358 HUVECs [36], suggests a combination of ligands more effectively antagonizes VEGF-mediated  
359 migration, and thus multiple Sema3s may control both the growth and trajectory of a sprout in the  
360 zebrafish trunk [67]. Studies in mouse and zebrafish demonstrate that inhibition of VEGFR2 results in  
361 dysregulation of actinomyosin contractility necessary for endothelial cell elongation and vessel  
362 connections [68, 69], similar to the phenotype we observe in *sema3fb* mutants. Sequestration of  
363 VEGF by SFLT1 further diminishes cell responses to limit endothelial cell size and actin  
364 rearrangements [70–72].

365 In cultured cells, exogenous SEMA3F controls F-actin/stress fiber formation, cell size, and  
366 elongation through disrupting the mTOR-RHOA/GTPase axis [30]. Although filopodia are dispensable  
367 for sprout initiation in zebrafish, assembly of F-actin into filopodia influences the speed, direction of

368 migration, and anastomosis of endothelial cells into a connected vessel bed [74, 75]. We observe that  
369 filopodia persist in *sema3fb* mutants (i.e., are abnormally stable). Loss of *sema3fb* may therefore  
370 hinder a pathway that destabilizes filopodia and vessel anastomosis may be impeded by underlying  
371 actin assembly defects. This is in line with the classic definition of Semas in regulating cell size and  
372 collapse of the cytoskeleton [11, 76]. Our data applies to the role of *Sema3fb* in the initial formation  
373 and early elongation of ISA sprouts. In later development, RhoA- dependent mechanisms [73] control  
374 arterial lumen diameter and remodeling in response to changes in *Vegf* bioavailability and *sFlt*  
375 localization. *Sema3fb* may therefore have additional roles in regulating structural vessel adaptations;  
376 however, we were unable to assay late changes to vessel morphology in *sema3fb* mutants as they  
377 recover by this stage.

378

379 Here we demonstrate an autocrine role for *Sema3f* to modulate *Vegf* function *in vivo*. Together,  
380 our data suggest that *Sema3fb* acts to limit both positive (*Vegfr2*) and negative (*sFlt1*) signals,  
381 allowing endothelial cells to adopt an appropriate level of signaling downstream of *Vegfr2* (Fig 5). Our  
382 data highlights a delicate balance of stop-go signals that can toggle the endothelial migration activity  
383 necessary for vessel growth. Together this work offers insight into understanding how context-  
384 dependent *Sema3F* modulation of endothelial responses to *Vegf* can be used to treat vascular  
385 disorders.

386

387

388

389

390

#### 391 **Acknowledgments:**

392 We thank Li Kun Phng for providing us with the *FliLifeact:GFP* construct. We thank the University of  
393 Calgary FACS core for assistance with cell sorting. We thank Suchit Ahuja, Jasper Greysen-Wong,

394 and Jae-Ryeon Ryu for comments on the manuscript, and Carrie Hehr for *sema3fb*<sup>ATG-MO</sup> morpholino  
395 injections.



396 **Materials and Methods:**

397 Zebrafish strains and maintenance: Wild type Tupfel longfin (TL) zebrafish or transgenic *Tg(-*  
398 *6.5kdrl:mCherry*)<sup>ci5</sup>, *Tg(fli1a:nEGFP)*<sup>y7</sup> [50], *sema3fa*<sup>ca304</sup> [35] , and *sema3fb*<sup>ca305</sup> [43] were used for  
399 experiments. Embryos were collected within 10-minute intervals and incubated at 28.5°C in E3  
400 embryo medium (E3) and staged in hours post-fertilization (hpf). Endogenous pigmentation was  
401 inhibited from 24 hpf by the addition of 0.003% 1-phenyl-2-thiourea (PTU, Sigma-Aldrich, St. Louis,  
402 MO) to E3. To genotype, tissue was collected from single 30 hpf embryos following blinded imaging.  
403 Genomic DNA was extracted in 50µl of 50mM NaOH, boiled for 10 minutes and buffered with 1/10  
404 volume of 100mM Tris-HCl pH 7.4, as described in [77] and amplified by PCR (as described by [43])  
405 using the following primers: *sema3fb* forward (5'-ATTGCCCCACAAAATAACATTC-3') and *sema3fb*  
406 reverse (5'-GTCTACTCTGTGAATTTCCCGC-3').

407

408 Morpholino and *fli:lifect* injections: Morpholinos (MO) against the *sema3fb* start codon (*sema3fb*<sup>ATG</sup>;  
409 ATG underlined) 5'- CATAGACTGTCCAAGAGCATGGTGC-3' and against the *tnnt2a* start codon  
410 (*tnnt2a*<sup>ATG</sup>, ATG underlined) 5'- CATGTTTGCTCTGATCTGACACGCA – 3' were obtained from Gene  
411 Tools LLC (Corvallis, OR, USA). Morpholinos were injected into one- to four-cell stage embryos within  
412 recommended dosage guidelines at 1ng/ embryo [78, 79]. For endothelial-specific expression of  
413 Lifect, a Tol2 construct using the *Fli1*<sup>ep</sup> promoter driving the expression of Lifect-EGFP, *fli1*<sup>ep</sup>*Lifect-*  
414 *EGFP* [74], was injected into one-cell stage embryos at 20 ng/µl plasmid with 25 ng/µl Tol2  
415 transposase RNA.

416

417 FAC sorting, RNA isolation, and RT-qPCR: For FACS analysis, 24 hpf *Tg(kdrl:mCherry)* wild type or  
418 mutant embryos were subjected to single-cell dissociation according to [80]. Briefly, embryos were  
419 washed once with calcium-free Ringers Solution and gently triturated 5 times before dissociation  
420 solution was added and incubated in a 28.5°C water bath with shaking and periodic trituration for 20-  
421 30 min. The reaction was stopped, centrifuged, and resuspended in Dulbecco's Phosphate-Buffered  
422 Saline (GE Healthcare Life Sciences, Logan, Utah, USA), centrifuged and resuspended in fresh

423 resuspension solution. The single-cell suspension was filtered with 75  $\mu\text{m}$ , followed by 35  $\mu\text{m}$  filters.  
424 Cells were sorted with a BD FACSAria III (BD Bioscience, San Jose, USA) and collected. Total RNA  
425 from 24hpf whole embryos or FACS sorted cells was isolated using the miRNeasy Mini Kit (Qiagen).  
426 500 ng of total RNA from each sample was reverse transcribed into cDNA using SuperScript III First-  
427 Strand Synthesis SuperMix (18080-400; Invitrogen). cDNA in a 5ng/ 10ul final reaction was used in a  
428 TaqMan Fast Advanced Master Mix (Thermo Fisher Scientific, Massachusetts, U.S). Reactions were  
429 assayed using a QuantStudio6 Real-time system (Thermo Fisher Scientific). Zebrafish specific  
430 Taqman assays (Thermo Fisher Scientific, Waltham, Massachusetts, USA) were used: vegfab (Cat#  
431 4448892, Clone ID: Dr03072613\_m1), kdrl(vegfr2) (4448892, Dr03432904\_m1), dll4  
432 (4448892,Dr03428646\_m1), notch2 (4448892, Dr03436779\_m1), jag1a (4448892, Dr03093490\_m1),  
433 sflt1 (4331448, ADP47YD4) and normalized to  $\beta$ -actin (4448489, Dr03432610\_m1). The  $\Delta\Delta\text{Ct}$  method  
434 was used to calculate the normalized relative expression level of a target gene from triplicate  
435 measurements. Experiments were repeated three times independently unless stated otherwise.

436  
437 Drug Treatments: For Vegfr2 inhibition, a 200  $\mu\text{M}$  SU5416 (Sigma #S8442) stock solution in DMSO  
438 (Sigma #D8418) or a 100  $\mu\text{M}$  DMH4 (Sigma #8696) stock solution in DMSO was diluted to working  
439 concentrations in fish water. For SU5416 final concentrations of 0.2  $\mu\text{M}$  SU5416 and 0.5  $\mu\text{M}$  in 0.1%  
440 DMSO were used as described in [54, 57, 81]. For DMH4 15  $\mu\text{M}$  and 25  $\mu\text{M}$  in 0.1% DMSO was used  
441 as described in [55, 56]. Embryos were treated from 20 to 30 hpf to target both ISA and DLAV  
442 angiogenesis. WT and homozygous *sema3fb*<sup>ca305</sup> mutant embryos were manually dechorionated  
443 before receiving the SU5416 or DMH4 and control (0.1% DMSO) treatments using a common solution  
444 for both genotypes.

445  
446 In situ hybridization and immunostaining: All embryos were fixed in 4% paraformaldehyde in PBS with  
447 0.1% Tween-20 at 4°C overnight, followed by 100% methanol at -20°C.

448 For colorimetric in situ hybridization (ISH) Digoxigenin (DIG)-labeled antisense RNA probes were  
449 synthesized using SP6 or T7 RNA polymerase (Roche, Basel, Switzerland). Digoxigenin RNA probes

450 were generated from plasmid template (*sema3fa* - pCR4, linearized with PmeI) (*sema3fb* - pCR4,  
451 linearized with NotI). Wholemount and section in situ hybridization were performed as described by  
452 [82] with some minor modifications: steps with gradient changes in hybridization buffer: 2 x SSC: and  
453 0.2 x SSC:PBST were carried out at 70°C and 0.2 x SSC at 37°C. NBT/BCIP was used at a  
454 2.5/3.5µl/ml ratio, respectively. Stained embryos were transferred to microcentrifuge tubes, fixed in 4%  
455 paraformaldehyde (PFA), and washed in 1 x PBST before imaging. For transverse sections of the  
456 trunk, following wholemount ISH embryos were embedded in JB4 medium (PolySciences, Warrington,  
457 PA). Briefly, embryos were fixed in 4% PFA overnight at 4°C, washed in PBS, and dehydrated in  
458 100% EtOH. Following dehydration, embryos were soaked in infiltration solution (2-hydroxyethyl  
459 methacrylate/benzoyl peroxide) until they sank to the bottom of the tube and then transferred and  
460 positioned in molds filled with embedding solution (infiltration with N-Dimethylaniline), allowed to  
461 harden overnight, and sectioned at 7 µm using a Leica microtome.

462 For Hybridization Chain Reaction (HCR) in situ hybridization, custom probes were obtained from  
463 Molecular Instruments (Los Angeles, CA) for soluble Flt1 (targeted to the unique region of the gene)  
464 and VEGFR2. The in-situ staining reactions were as recommended by the manufacturer.

465 For antibody staining, embryos were permeabilized in 50:50 acetone/methanol for 20 minutes,  
466 rehydrated at room temperature, and then blocked in 10% normal sheep serum in PBST with 1%  
467 triton, and incubated for at least 48 hours at 4°C in primary antibody. Immunostaining for Laminin  
468 (1:400, Sigma-Aldrich, Missouri, United States), mCherry (1:200, Developmental Studies Hybridoma  
469 Bank, Iowa City, United States ), and phosphoERK (pERK) (1:500, Cell Signaling 43701:Danvers, MA,  
470 USA) were detected with mouse anti-mCherry antibody, (1:500, Clontech, Mountain View, California,  
471 USA) and detected with Alexafluor 555 or 488 secondary antibodies (1:500; Invitrogen), for 1 hour at  
472 RT in 5% NSS/PBST/0.1% triton.

473

474 Image acquisition and measurements: For wholemount imaging, embryos were immobilized in 0.004%  
475 Tricaine (Sigma) and mounted in 0.8% low melt agarose on glass-bottom dishes (MatTek, Ashland,  
476 MA). Confocal images were collected on a Zeiss LSM 700 inverted microscope. Slices 1–3 µm apart

477 were gathered and processed in Zen Blue 2012 software and presented as maximal intensity  
478 projections (z-stacks, total of 10-15 slices per embryo/image), and analyzed using FIJI/ImageJ [83].  
479 For time-lapse, z-stacks were acquired every 10-30 min for 5 hours, from 25 hpf - 29 hpf. ZEN Blue  
480 2012 software was used to extract timepoints and image processing/measurements were performed  
481 using Fiji (ImageJ).  
482 Unless otherwise, ISA measurements were performed on at least 8 ISAs per embryo. ISA length  
483 measurements were made with a segmented line tool along the vessel from the edge of the aorta to  
484 the leading edge of the sprout. To calculate the % connected, each ISA connection to its neighboring  
485 sprout was counted and expressed as a percentage of the total number of ISA counted. For ISA  
486 sprout diameter, 5 sprouts were measured at the boundary of the horizontal myoseptum. For DA and  
487 PCV measurements, 5 measurements were taken along the DA and PCV, directly below the ISAs  
488 above the yolk extension. For endothelial cell nuclei spacing, 2 measurements were taken from the  
489 middle of each nucleus to the next nucleus. To measure fluorescent kdrl:mCherry intensity, total  
490 fluorescence (TF) was calculated using the formula:  $TF = \text{Integrated Density} - (\text{Area of selected cell} \times$   
491  $\text{Mean fluorescence of background readings})$ . The area for measurement was gated by tracing 5 ISVs  
492 above the yolk extension.  
493 For angioblast migration and ISA speed calculations, analysis was from images obtained at 30min  
494 intervals from 25 hpf – 29hpf. For ISA length over time, 5 ISAs were measured per embryo (as  
495 described above) at each extracted timepoint. For ISA migration speed, changes in ISA length were  
496 compared at 1hr intervals, 25 (T1) – 26(T2) hpf, 26 (T2)- 27(T3) hpf, 27(T3) – 28(T4) hpf, and 28 (T4)  
497 – 29 (T5) hpf, and distance traveled was calculated using the formula  $\text{Distance} = \text{End Length } (\mu\text{m}) -$   
498  $\text{Start Length } (\mu\text{m})$ . (e.g.,  $\text{Distance from 25 – 26 hpf} = \text{Length at T2} - \text{Length at T1}$ ). The speed of ISA  
499 migration at each interval was calculated using the formula  $\text{Speed} = \text{Distance } (\mu\text{m}) / \text{Time (min)}$  (See  
500 S1, S2 Table) For lead angioblast migration, the distance of a *fli1a:nEGFP* positive nucleus from the  
501 DA was measured at 1-hour intervals from 25 – 29 hpf.

502

503 **Statistics:** All data sets for quantitation (qualitative scorings or absolute measurements) were analyzed  
504 blinded. Results are expressed as mean  $\pm$  SD. All statistical analysis was performed using Prism 7  
505 software (Graph Pad). Unpaired, nonparametric tests were used for all statistical tests, either the  
506 Student T-test with Welch's correction for comparisons of two samples, or Two-Way ANOVA with a  
507 Kruskal-Wallis test for comparisons between multiple samples. **Figure captions:**

508

509 **Fig 1: Endothelial expressed sema3fb promotes endothelial cell sprouting**

510 A) Lateral view of sema3fb expression at 30hpf by ISH. Inset shows expression in the dorsal aorta  
511 (DA) and intersegmental arteries (ISAs). B) Schematic representation of the zebrafish vasculature at  
512 30 hpf. Inset: The ISAs sprout from the DA and connect to form the Dorsal Longitudinal Anastomotic  
513 Vessel (DLAV) by 30 hpf. C-E) Lateral confocal images of the trunk vasculature (black) of 30 hpf (C)  
514 wild type sibling (sib), (D) heterozygous (het) sema3fb<sup>ca305/+</sup> and (E) homozygous (hom) sema3fb<sup>ca305</sup>  
515 mutants. Gaps in the DLAV (blue asterisks) and truncated ISA sprouts (yellow arrowhead) are noted.  
516 Abbreviations: DA (Dorsal Aorta), and PCV (Posterior Cardinal Vein). Anterior, left; Dorsal, up. Scale  
517 bar, 100  $\mu$ m. F) ISA Sprout length at 30 hpf in wild type (WT) sibs (mean length of 106 $\pm$ 10  $\mu$ m), het  
518 sema3fb<sup>ca305/+</sup> (92 $\pm$ 19 $\mu$ m), and hom sema3fb<sup>ca305</sup> (91 $\pm$ 18 $\mu$ m)., \*\*\*\*p<0.0001. G) Percentage of ISA  
519 sprouts connecting to form DLAV at 30 hpf. WT sib (mean 83% connected) , het sema3fb<sup>ca305/+</sup> (50%  
520 connected) and hom sema3fb<sup>ca305</sup> (42% connected), \*\*\*\*p<0.0001. H) Quantification of the cross-  
521 sectional diameter of ISA sprout at the level of the horizontal myoseptum (HM; dashed red line). WT  
522 sib (mean diameter of 6.9 $\pm$ 2  $\mu$ m), het sema3fb<sup>ca305/+</sup> (8.5 $\pm$ 2.7  $\mu$ m), and hom sema3fb<sup>ca305</sup> (9.2 $\pm$ 2.9  
523  $\mu$ m)., \*\*p<0.0016 and \*\*\*p=0.0002. F-G) N=3; WT sib = 11 embryos (n=86 ISAs), het sema3fb<sup>ca305/+</sup> =  
524 22 embryos (n=163 ISAs), and hom sema3fb<sup>ca305</sup>=9 embryos (n=75 ISAs), 2-Way ANOVA Tukey's  
525 multiple comparisons test. Error bars =  $\pm$ SD.

526

527 **Fig 2: Loss of sema3fb disrupts ISA migration**

528 A) Lateral confocal time-lapse images from 25-29 hpf double transgenic Tg(kdrl:mCherry;fli1a:nEGFP)  
529 endothelial cells (magenta) and nuclei (white). The location of the horizontal myoseptum (green

530 dashed line) and DLAV (blue dashed line) are noted to highlight ISA growth over time. Scale bar, 50  
531  $\mu\text{m}$ . B) Average ISA Sprout Length at 30-minute intervals from 25 – 29 hpf : WT vs *sema3fb*<sup>ca305</sup> at  
532 25.0 hpf , p = 0.474; at 25.5 hpf p =0.262; at 26.0 hpf p=0.081; at 26.5 hpf \*p =0.023; at 27.0 hpf p\*=  
533 0.020 ; at 27.5 hpf \*\*p =0.030 ; At 28.0 hpf \*\*p =0.008; at 28.5 hpf \*\*p =0.007; t 29.0 hpf \*p =0.024. C-  
534 E) Quantification of ISA migration speeds ( $\mu\text{m}/\text{min}$ ). C) At 26 - 27 hpf WT= 0.15  $\mu\text{m}/\text{min}$  and  
535 *sema3fb*<sup>ca305</sup> = 0.12  $\mu\text{m}/\text{min}$ , p =0.157. D) At 27- 28 hpf WT= 0.19  $\mu\text{m}/\text{min}$  and *sema3fb*<sup>ca305</sup> = 0.13  
536  $\mu\text{m}/\text{min}$ , \*p =0.020. E) At 28 - 29 hpf: WT= 0.16  $\mu\text{m}/\text{min}$  and *sema3fb*<sup>ca305</sup> = 0.19  $\mu\text{m}/\text{min}$ , p =0.461. B-  
537 E) N = 2; WT =7 embryos (n=33 ISAs) and *sema3fb*<sup>ca305</sup>=7 embryos (n=35 ISAs), Unpaired t-test with  
538 Welch's correction. F-H) Lead angioblast distance from DA at 1hr intervals. F) At 27 hpf mean  
539 distance from DA: WT= 55.12 $\pm$ 14.06  $\mu\text{m}$  and *sema3fb*<sup>ca305</sup> = 47.18 $\pm$ 5.75  $\mu\text{m}$ , \*p =0.030. G) At 28 hpf  
540 mean distance from DA: WT= 71.57 $\pm$ 15.47  $\mu\text{m}$  and *sema3fb*<sup>ca305</sup> = 55.47 $\pm$ 9.65  $\mu\text{m}$ , \*\*\*p=0.0008. H) At  
541 29 hpf mean distance from DA: WT= 85.19 $\pm$ 18.03  $\mu\text{m}$  and *sema3fb*<sup>ca305</sup> = 68.36 $\pm$ 16.64  $\mu\text{m}$ , \*\*p  
542 =0.008. F-H) N = 1: WT =4 embryos (20 ISAs) and *sema3fb*<sup>ca305</sup>=3 embryos (15 ISAs), Unpaired t-test  
543 with Welch's correction. I) Lateral confocal images of 30hpf double transgenic  
544 Tg(kdrl:mCherry;fli1a:nEGFP) endothelial cells (ECs, magenta) and nuclei (white). EC nuclei clumps  
545 (blue arrows/arrowheads) are noted. Scale bar, 100  $\mu\text{m}$ . Inset: Schematics show method for  
546 measuring distance between EC nuclei and highlight EC nuclei clumps in ISAs. J) Number of EC  
547 nuclei (angioblasts) per ISAs at 30 hpf. WT (mean of 3 nuclei/ISA), heterozygous (het) *sema3fb*<sup>ca305/+</sup>  
548 (3 nuclei/ISA), and homozygous (hom) *sema3fb*<sup>ca305</sup> (3 nuclei/ISA). K) Quantification of inter-  
549 endothelial nuclei spacing per ISA at 30 hpf. WT (mean 28 $\pm$ 13  $\mu\text{m}$ ), het *sema3fb*<sup>ca305/+</sup> (23 $\pm$ 13 $\mu\text{m}$ ), and  
550 hom *sema3fb*<sup>ca305</sup> (22 $\pm$ 14  $\mu\text{m}$ ), \*\*\*p= 0.0002 and \*\*\*\*p<0.0001. L) Quantification of Average Area EC  
551 fli1a:nEGFP positive nuclei (angioblasts) per ISAs at 30 hpf. WT (mean 49 $\pm$ 18  $\mu\text{m}^2$ ), het *sema3fb*<sup>ca305/+</sup>  
552 (mean 60 $\pm$ 24  $\mu\text{m}^2$ ), and hom *sema3fb*<sup>ca305</sup> (mean 56 $\pm$ 23  $\mu\text{m}^2$ ), \*\*p= 0.0069 and \*\*\*\*p<0.0001. I-L) N =3  
553 ; WT =14 embryos (n=138 ISAs), het *sema3fb*<sup>ca305/+</sup>=19 embryos (n=190 ISAs), and  
554 hom*sema3fb*<sup>ca305</sup>=11 embryos (n=110 ISAs), . 2-Way ANOVA Tukey's multiple comparisons test Error  
555 bars =  $\pm$ SD.

556

557 **Fig 3: *sema3fb* mutants display aberrant and persistent filopodia in the dorsal ISA**

558 A) Lateral images of the trunk vasculature with mosaic endothelial expression of the transgene *fli1ep*:  
559 Lifeact-EGFP highlighting actin (green) and endothelial cytoplasm using Tg(*kdr*:mCherry; white) in  
560 ISAs at 30 hpf. DLAV gaps (blue asterisks) and truncated ISA sprouts (yellow arrowheads) are  
561 marked. Insets show enlarged subset single ISAs with Lifeact-EGFP expression and reach the level of  
562 DLAV at 30hpf. Scale bar, 100  $\mu$ m. B) Representative still images from time-lapse imaging from 28 –  
563 30 hpf. Enlarged still images of stage-matched embryos with mosaic Lifeact-EGFP (green) in  
564 endothelial cells spanning the ISA and reaching the level of the DLAV by 28 hpf in both wild type and  
565 *sema3fb*<sup>ca305</sup> embryo. Endothelial cytoplasm is shown in red Tg(*kdr*:mCherry). White arrowheads  
566 indicate filopodia present in connecting ISA sprouts within the boxed regions below the DLAV. C)  
567 Quantification of number Lifeact-EGFP positive filopodia on ISAs from 28-30 hpf from embryos of the  
568 indicated genotypes. N= 3: WT (1 EGFP positive ISAs/ 30 ISAs total, 6 embryos, mean of 4  
569 filopodia/ISA) and homozygous *sema3fb*<sup>ca305</sup> (18 EGFP positive ISAs/35s ISAs total, 7 embryos, mean  
570 of 7 filopodia/ISA). Unpaired t-test with Welch's correction, \*p= 0.03 and \*\*\*p=0.0002. Error bars =  
571  $\pm$ SD.

572

573 **Fig 4: *sema3fb* mutants have increased VEGF receptor expression and activity**

574 A) RT-qPCR analysis of key endothelial markers in wild type and *sema3fb*<sup>ca305</sup> FACS isolated  
575 Tg(*kdr*:mCherry) positive endothelial cells at 26hpf (inset). N=2, 2-Way ANOVA Tukey's multiple  
576 comparisons test, \*p= 0.0184, \*\*p=0.0021, and \*\*\*\*p<0.0001 (Refer to Supplementary Table 3 for fold-  
577 change details). B) Fluorescent HCR in situ of 30 hpf whole-mount wild type and embryos  
578 *sema3fb*<sup>ca305</sup> embryos. Representative images show punctate overlapping expression of *vegfr2* (*white*)  
579 and *sflt1* (*red*) mRNA transcripts within DA and ISAs (dashed white outline). C) Quantification of HCR  
580 in situ pixel density in ISAs and DA, wild type (WT, n=3 embryos, 15 ISAs) and *sema3fb*<sup>ca305</sup> (n=3,  
581 embryos, 15 ISAs), Unpaired Student's t-test with Welch's correction WT vs. *sema3fb*<sup>ca305</sup>: *vegfr2*  
582 \*p=0.047 and *sflt1* \*p=0.036. D) Whole-mount Immunostaining for phosphoERK (pERK) in WT and  
583 *sema3fb*<sup>ca305</sup> embryos fixed at 30 hpf. Representative images show Tg(*kdr*:mCherry) positive ISAs

584 (purple) and pERK positive ECs (green). Inset: pERK positive ISAs are traced using *kdrl:mCherry*  
585 expression. Oval dashed circles highlight individual ECs with pERK staining within each ISA. E)  
586 Number of pERK positive ISAs at 30hpf. F) Quantification of average pERK fluorescence intensity in  
587 embryos at 30 hpf. D-E) N= 3, WT (n=21 embryos, mean of 5 pERK positive ISAs), and homozygous  
588 *sema3fb*<sup>ca305</sup> (n= 19 embryos, mean of 5 pERK positive ISAs). 2-Way ANOVA Tukey's multiple  
589 comparisons test, \*p= 0.012. G) Schematic of Vegfr2 inhibition time course, embryos are treated at 20  
590 hpf with either 0.1%DMSO or Vegfr2 inhibitors and removed from treatment for live imaging at 30hpf.  
591 H) Representative confocal images of trunk vasculature (black) of 30 hpf embryos treated with DMSO  
592 control or 0.2  $\mu$ M SU5416. DLAV gaps (blue asterisks) and truncated ISA (yellow arrowheads) are  
593 marked. Scale bar, 100  $\mu$ m. I) Length of ISA sprouts in treated embryos at 30 hpf: WT + DMSO (n=25  
594 ISAs, mean of 104 $\pm$ 9  $\mu$ m), WT + 0.2  $\mu$ M SU5416 (n=25 ISAs, mean of 92 $\pm$ 17  $\mu$ m), *sema3fb*<sup>ca305</sup> +  
595 DMSO (n=30 ISAs, mean of 85 $\pm$ 17  $\mu$ m), and *sema3fb*<sup>ca305</sup> + 0.2 $\mu$ m SU5416 (n=30 ISAs, mean of  
596 98 $\pm$ 11  $\mu$ m) \*\*p= 0.0039 and \*\*\*\*p<0.0001. J) Percentage of ISA sprouts connected at DLAV in treated  
597 embryos at 30 hpf . WT + DMSO (n=25 ISA-DLAV, 5 embryos, mean 88 $\pm$ 11%), WT + 0.2 $\mu$ M SU5416  
598 (n=25 ISA-DLAV, mean 32 $\pm$ 11%), *sema3fb*<sup>ca305</sup> + DMSO (=30 ISA-DLAV, mean 46 $\pm$ 16%), and  
599 *sema3fb*<sup>ca305</sup> +0.2  $\mu$ m SU5416 (n=30 ISA-DLAV, mean 73 $\pm$ 10%), \*\*p= 0.0084, \*\*\*p=0.0002, and  
600 \*\*\*\*p<0.0001. I-FJ N= 2; WT+DMSO=5 embryos, WT + 0.2  $\mu$ M SU5416 =5 embryos, *sema3fb*<sup>ca305</sup> +  
601 DMSO = 6 embryos, *sema3fb*<sup>ca305</sup> + 0.2  $\mu$ m SU5416 = 6 embryos, . 2-Way ANOVA Tukey's multiple  
602 comparisons test. Error Bars =  $\pm$ SD.

603

### 604 **Fig 5: Model of *sema3fb* action in sprouting vessels**

605 *Sema3fb* is expressed by endothelial cells during angiogenic sprout formation and acts through an  
606 autocrine mechanism to suppress *Vegfr2* expression and maintain endothelial cell dynamics via  
607 controlling *Dll4* expression and Notch signaling in addition to modulation of pERK. Loss of *sema3fb*  
608 increases *Vegfr2*, pERK, *Dll4*, and *sFlt1* expression. This results in aberrant cellular morphology with  
609 wider sprouts, persistent filopodia, and larger nuclei. The changes in nuclear size and disrupted



610 sprouting suggest a possible role for Sema3b to limit Vegf-mediated induction of downstream pERK  
611 signaling.

612 **References:**

- 613 1. Carmeliet P (2003) Angiogenesis in health and disease. *Nat. Med.* 9:653–660
- 614 2. Fischer C, Schneider M, Carmeliet P (2006) Principles and Therapeutic Implications of  
615 Angiogenesis, Vasculogenesis and Arteriogenesis. In: *The Vascular Endothelium II*. Springer  
616 Berlin Heidelberg, pp 157–212
- 617 3. Ramasamy SK, Kusumbe AP, Adams RH (2015) Regulation of tissue morphogenesis by  
618 endothelial cell-derived signals. *Trends Cell Biol.* 25:148–157
- 619 4. Hogan BM, Schulte-Merker S (2017) How to Plumb a Pisces: Understanding Vascular  
620 Development and Disease Using Zebrafish Embryos. *Dev. Cell*
- 621 5. Gerhardt H, Golding M, Fruttiger M, et al (2003) VEGF guides angiogenic sprouting utilizing  
622 endothelial tip cell filopodia. *J Cell Biol* 161:1163–1177. <https://doi.org/10.1083/jcb.200302047>
- 623 6. Geudens I, Gerhardt O (2011) Coordinating cell behaviour during blood vessel formation.  
624 *Development* 138:4569–4583
- 625 7. Yokota Y, Nakajima H, Wakayama Y, et al (2015) Endothelial Ca<sup>2+</sup> oscillations reflect VEGFR  
626 signaling-regulated angiogenic capacity in vivo. *Elife* 4:. <https://doi.org/10.7554/eLife.08817>
- 627 8. Bayless KJ, Johnson GA (2011) Role of the Cytoskeleton in Formation and Maintenance of  
628 Angiogenic Sprouts. *J Vasc Res* 48:369–385. <https://doi.org/10.1159/000324751>
- 629 9. Mattila PK, Lappalainen P (2008) Filopodia: Molecular architecture and cellular functions. *Nat.*  
630 *Rev. Mol. Cell Biol.* 9:446–454
- 631 10. Pollard TD, Cooper JA (2009) Actin, a central player in cell shape and movement. *Science* (80-  
632 ). 326:1208–1212
- 633 11. Adams RH, Eichmann A (2010) Axon guidance molecules in vascular patterning. *Cold Spring*  
634 *Harb. Perspect. Biol.* 2
- 635 12. Carmeliet P, Tessier-Lavigne M (2005) Common mechanisms of nerve and blood vessel wiring.

- 636 Nature 436:193–200
- 637 13. Lobov IB, Renard RA, Papadopoulos N, et al (2007) Delta-like ligand 4 (Dll4) is induced by  
638 VEGF as a negative regulator of angiogenic sprouting. *Proc Natl Acad Sci* 104:3219 LP – 3224.  
639 <https://doi.org/10.1073/pnas.0611206104>
- 640 14. Siekmann AF, Covassin L, Lawson ND (2008) Modulation of VEGF signalling output by the  
641 Notch pathway. *BioEssays* 30:303–313. <https://doi.org/10.1002/bies.20736>
- 642 15. High FA, Lu MM, Pear WS, et al (2008) Endothelial expression of the Notch ligand Jagged1 is  
643 required for vascular smooth muscle development. *Proc Natl Acad Sci* 105:1955 LP – 1959
- 644 16. Hellström M, Phng LK, Hofmann JJ, et al (2007) Dll4 signalling through Notch1 regulates  
645 formation of tip cells during angiogenesis. *Nature* 445:776–780.  
646 <https://doi.org/10.1038/nature05571>
- 647 17. Bautch VL (2009) Endothelial Cells Form a Phalanx to Block Tumor Metastasis. *Cell* 136:810–  
648 812
- 649 18. Wiley DM, Kim J-D, Hao J, et al (2011) Distinct signalling pathways regulate sprouting  
650 angiogenesis from the dorsal aorta and the axial vein. *Nat Cell Biol* 13:686–692
- 651 19. Bussmann J, Wolfe SA, Siekmann AF (2011) Arterial-venous network formation during brain  
652 vascularization involves hemodynamic regulation of chemokine signaling. *Development*  
653 138:1717–1726. <https://doi.org/10.1242/dev.059881>
- 654 20. Gu C, Yoshida Y, Livet J, et al (2005) Semaphorin 3E and plexin-D1 control vascular pattern  
655 independently of neuropilins. *Science* (80- ) 307:265–268.  
656 <https://doi.org/10.1126/science.1105416>
- 657 21. Bielenberg DR, Hida Y, Shimizu A, et al (2004) Semaphorin 3F, a chemorepellent for  
658 endothelial cells, induces a poorly vascularized, encapsulated, nonmetastatic tumor phenotype.  
659 *J Clin Invest* 114:1260–1271. <https://doi.org/10.1172/JCI21378>

- 660 22. Torres-Vázquez J, Gitler AD, Fraser SD, et al (2004) Semaphorin-plexin signaling guides  
661 patterning of the developing vasculature. *Dev Cell* 7:117–123.  
662 <https://doi.org/10.1016/j.devcel.2004.06.008>
- 663 23. Ochsenbein AM, Karaman S, Proulx ST, et al (2016) Endothelial cell-derived semaphorin 3A  
664 inhibits filopodia formation by blood vascular tip cells. *Dev* 143:589–594.  
665 <https://doi.org/10.1242/dev.127670>
- 666 24. Kim J, Oh WJ, Gaiano N, et al (2011) Semaphorin 3E-plexin-d1 signaling regulates VEGF  
667 function in developmental angiogenesis via a feedback mechanism. *Genes Dev* 25:1399–1411.  
668 <https://doi.org/10.1101/gad.2042011>
- 669 25. Lamont RE, Lamont EJ, Childs SJ (2009) Antagonistic interactions among Plexins regulate the  
670 timing of intersegmental vessel formation. *Dev Biol* 331:199–209.  
671 <https://doi.org/10.1016/j.ydbio.2009.04.037>
- 672 26. Zygmunt T, Gay CM, Blondelle J, et al (2011) Semaphorin-PlexinD1 Signaling Limits  
673 Angiogenic Potential via the VEGF Decoy Receptor sFlt1. *Dev Cell* 21:301–314.  
674 <https://doi.org/10.1016/j.devcel.2011.06.033>
- 675 27. Zhang H, Vreeken D, Junaid A, et al (2020) Endothelial Semaphorin 3F Maintains Endothelial  
676 Barrier Function and Inhibits Monocyte Migration. *Int J Mol Sci* 21:1471.  
677 <https://doi.org/10.3390/ijms21041471>
- 678 28. Yuan HSH, Katyal S, Anderson JE (2018) A mechanism for semaphorin-induced apoptosis:  
679 DNA damage of endothelial and myogenic cells in primary cultures from skeletal muscle.  
680 *Oncotarget* 9:22618–22630. <https://doi.org/10.18632/oncotarget.25200>
- 681 29. Regano D, Visintin A, Clapero F, et al (2017) Sema3F (Semaphorin 3F) Selectively Drives an  
682 Extraembryonic Proangiogenic Program. *Arterioscler Thromb Vasc Biol* 37:1710–1721.  
683 <https://doi.org/10.1161/ATVBAHA.117.308226>
- 684 30. Nakayama H, Bruneau S, Kochupurakkal N, et al (2015) Regulation of mTOR signaling by

- 685 semaphorin 3F-neuropilin 2 interactions in vitro and in vivo. *Sci Rep* 5:1–14.  
686 <https://doi.org/10.1038/srep11789>
- 687 31. He L, Vanlandewijck M, Mäe MA, et al (2018) Data descriptor: Single-cell RNA sequencing of  
688 mouse brain and lung vascular and vessel-associated cell types. *Sci Data* 5:1–11.  
689 <https://doi.org/10.1038/sdata.2018.160>
- 690 32. Vanlandewijck M, He L, Mäe MA, et al (2018) A molecular atlas of cell types and zonation in the  
691 brain vasculature. *Nature* 554:475–480. <https://doi.org/10.1038/nature25739>
- 692 33. Shimizu A, Mammoto A, Italiano JE, et al (2008) ABL2/ARG Tyrosine Kinase Mediates  
693 SEMA3F-induced RhoA Inactivation and Cytoskeleton Collapse in Human Glioma Cells. *J Biol*  
694 *Chem* 283:27230–27238. <https://doi.org/10.1074/jbc.M804520200>
- 695 34. Sun Y, Liegl R, Gong Y, et al (2017) Sema3f Protects Against Subretinal Neovascularization In  
696 Vivo. *EBioMedicine* 18:281–287. <https://doi.org/10.1016/j.ebiom.2017.03.026>
- 697 35. Halabi R, Watterston C, Hehr C.L, Mori-Kreiner R, Childs S.J MS (in press) Semaphorin 3f  
698 controls ocular vascularization from the embryo through to the adult. *Invest Ophthalmol Vis Sci*
- 699 36. Guttman-Raviv N, Shraga-Heled N, Varshavsky A, et al (2007) Semaphorin-3A and  
700 semaphorin-3F work together to repel endothelial cells and to inhibit their survival by induction  
701 of apoptosis. *J Biol Chem* 282:26294–26305. <https://doi.org/10.1074/jbc.M609711200>
- 702 37. Chauvet S, Cohen S, Yoshida Y, et al (2007) Gating of Sema3E/PlexinD1 signaling by  
703 neuropilin-1 switches axonal repulsion to attraction during brain development. *Neuron* 56:807–  
704 822. <https://doi.org/10.1016/j.neuron.2007.10.019>
- 705 38. Yu HH, Moens CB (2005) Semaphorin signaling guides cranial neural crest cell migration in  
706 zebrafish. *Dev Biol* 280:373–385. <https://doi.org/10.1016/j.ydbio.2005.01.029>
- 707 39. Isogai S, Horiguchi M, Weinstein BM (2001) The Vascular Anatomy of the Developing  
708 Zebrafish: An Atlas of Embryonic and Early Larval Development. *Dev Biol* 230:278–301.

- 709 <https://doi.org/http://dx.doi.org/10.1006/dbio.2000.9995>
- 710 40. Farnsworth DR, Saunders LM, Miller AC (2020) A single-cell transcriptome atlas for zebrafish  
711 development. *Dev Biol* 459:100–108. <https://doi.org/https://doi.org/10.1016/j.ydbio.2019.11.008>
- 712 41. Halabi R, Cechmanek PB, Hehr CL, McFarlane S (2021) Semaphorin3f as an intrinsic regulator  
713 of chamber-specific heart development. *bioRxiv* 2021.05.19.444704.  
714 <https://doi.org/10.1101/2021.05.19.444704>
- 715 42. Halabi R (2019) Semaphorin3f as a spatial regulator of embryogenesis. Cumming School of  
716 Medicine
- 717 43. Halabi R (2019) Semaphorin3f as a spatial regulator of embryogenesis. Doctoral dissertation,  
718 University of Calgary
- 719 44. Lamont RE, Wu C-Y, Ryu J-R, et al (2016) The LIM-homeodomain transcription factor *Islet2a*  
720 promotes angioblast migration. *Dev Biol* 414:181–192.  
721 <https://doi.org/https://doi.org/10.1016/j.ydbio.2016.04.019>
- 722 45. Wang L, Zhang P, Wei Y, et al (2011) Ablood flow-dependent *klf2a*-NO signaling cascade is  
723 required for stabilization of hematopoietic stem cell programming in zebrafish embryos. *Blood*  
724 118:4102–4110. <https://doi.org/10.1182/blood-2011-05-353235>
- 725 46. Karthik S, Djukic T, Kim JD, et al (2018) Synergistic interaction of sprouting and intussusceptive  
726 angiogenesis during zebrafish caudal vein plexus development. *Sci Rep* 8:1–15.  
727 <https://doi.org/10.1038/s41598-018-27791-6>
- 728 47. Sehnert AJ, Huq A, Weinstein BM, et al (2002) Cardiac troponin T is essential in sarcomere  
729 assembly and cardiac contractility. *Nat Genet* 31:106–110. <https://doi.org/10.1038/ng875>
- 730 48. Nicoli S, Knyphausen C-P, Zhu LJ, et al (2012) miR-221 is required for endothelial tip cell  
731 behaviors during vascular development. *Dev Cell* 22:418–29.  
732 <https://doi.org/10.1016/j.devcel.2012.01.008>

- 733 49. Lin C-Y, Lee H-C, Fu C-Y, et al (2013) ARTICLE miR-1 and miR-206 target different genes to  
734 have opposing roles during angiogenesis in zebrafish embryos. Nat Commun 4:.  
735 <https://doi.org/10.1038/ncomms3829>
- 736 50. Roman BL, Pham VN, Lawson ND, et al (2002) Disruption of *acvr1l* increases endothelial cell  
737 number in zebrafish cranial vessels. Development 129:3009–3019
- 738 51. Lawson ND, Weinstein BM (2002) In vivo imaging of embryonic vascular development using  
739 transgenic zebrafish. Dev Biol 248:307–318
- 740 52. Childs S, Chen J-N, Garrity DM, Fishman MC (2002) Patterning of angiogenesis in the  
741 zebrafish embryo. Development 129:973 LP – 982
- 742 53. Fan X, Rai A, Kambham N, et al (2014) Endometrial VEGF induces placental sFLT1 and leads  
743 to pregnancy complications. J Clin Invest 124:4941–4952. <https://doi.org/10.1172/JCI76864>
- 744 54. Carretero-Ortega J, Chhangawala Z, Hunt S, et al (2019) GIPC proteins negatively modulate  
745 Plexind1 signaling during vascular development. Elife 8:. <https://doi.org/10.7554/eLife.30454>
- 746 55. Goi M, Childs SJ (2016) Patterning mechanisms of the sub-intestinal venous plexus in  
747 zebrafish. Dev Biol 409:114–128. <https://doi.org/10.1016/j.ydbio.2015.10.017>
- 748 56. Hao J, Ho JN, Lewis JA, et al (2010) In vivo structure - Activity relationship study of  
749 dorsomorphin analogues identifies selective VEGF and BMP inhibitors. ACS Chem Biol 5:245–  
750 253. <https://doi.org/10.1021/cb9002865>
- 751 57. Covassin LD, Villefranc JA, Kacergis MC, et al (2006) Distinct genetic interactions between  
752 multiple Vegf receptors are required for development of different blood vessel types in  
753 zebrafish. Proc Natl Acad Sci U S A 103:6554–6559. <https://doi.org/10.1073/pnas.0506886103>
- 754 58. Williams CK, Li JL, Murga M, et al (2006) Up-regulation of the Notch ligand Delta-like 4 inhibits  
755 VEGF-induced endothelial cell function. Blood 107:931–939. [https://doi.org/10.1182/blood-](https://doi.org/10.1182/blood-2005-03-1000)  
756 2005-03-1000

- 757 59. Krueger J, Liu D, Scholz K, et al (2011) Flt1 acts as a negative regulator of tip cell formation  
758 and branching morphogenesis in the zebrafish embryo. *Development* 138:2111–2120.  
759 <https://doi.org/10.1242/dev.063933>
- 760 60. Zarkada G, Heinolainen K, Makinen T, et al (2015) VEGFR3 does not sustain retinal  
761 angiogenesis without VEGFR2. *Proc Natl Acad Sci U S A* 112:761–766.  
762 <https://doi.org/10.1073/pnas.1423278112>
- 763 61. Siekmann AF, Lawson ND (2007) Notch signalling limits angiogenic cell behaviour in  
764 developing zebrafish arteries. *Nature* 445:781–784. <https://doi.org/10.1038/nature05577>
- 765 62. Nasarre P, Constantin B, Rouhaud L, et al (2003) Semaphorin SEMA3F and VEGF have  
766 opposing effects on cell attachment and spreading. *Neoplasia* 5:83–92.  
767 [https://doi.org/10.1016/s1476-5586\(03\)80020-9](https://doi.org/10.1016/s1476-5586(03)80020-9)
- 768 63. Nasarre P, Kusy S, Constantin B, et al (2005) Semaphorin SEMA3F has a repulsing activity on  
769 breast cancer cells and inhibits E-cadherin-mediated cell adhesion. *Neoplasia* 7:180–189.  
770 <https://doi.org/10.1593/neo.04481>
- 771 64. Guo HF, Li X, Parker MW, et al (2013) Mechanistic basis for the potent anti-angiogenic activity  
772 of Semaphorin 3f. *Biochemistry* 52:7551–7558. <https://doi.org/10.1021/bi401034q>
- 773 65. Park JK, Jeong JW, Kang MY, et al (2010) Inhibition of the PI3K-Akt Pathway Suppresses sFlt1  
774 Expression in Human Placental Hypoxia Models In Vitro. *Placenta* 31:621–629.  
775 <https://doi.org/10.1016/J.PLACENTA.2010.04.009>
- 776 66. Brambilla E, Constantin B, Drabkin H, Roche J (2000) Semaphorin SEMA3F localization in  
777 malignant human lung and cell lines: A suggested role in cell adhesion and cell migration. *Am J*  
778 *Pathol* 156:939–950. [https://doi.org/10.1016/S0002-9440\(10\)64962-0](https://doi.org/10.1016/S0002-9440(10)64962-0)
- 779 67. Koch S, Claesson-Welsh L (2012) Signal transduction by vascular endothelial growth factor  
780 receptors. *Cold Spring Harb. Perspect. Med.* 2:a006502



- 781 68. Graupera M, Guillermet-Guibert J, Foukas LC, et al (2008) Angiogenesis selectively requires  
782 the p110 $\alpha$  isoform of PI3K to control endothelial cell migration. *Nature* 453:662–666.  
783 <https://doi.org/10.1038/nature06892>
- 784 69. Angulo-Urarte A, Casado P, Castillo SD, et al (2018) Endothelial cell rearrangements during  
785 vascular patterning require PI3-kinase-mediated inhibition of actomyosin contractility. *Nat*  
786 *Commun* 9:1–16. <https://doi.org/10.1038/s41467-018-07172-3>
- 787 70. Wang F, Yamauchi M, Muramatsu M, et al (2011) RACK1 regulates VEGF/Flt1-mediated cell  
788 migration via activation of a PI3K/Akt pathway. *J Biol Chem* 286:9097–9106.  
789 <https://doi.org/10.1074/jbc.M110.165605>
- 790 71. Tsuji-Tamura K, Ogawa M (2016) Inhibition of the PI3K–Akt and mTORC1 signaling pathways  
791 promotes the elongation of vascular endothelial cells. *J Cell Sci* 129:1165 LP – 1178.  
792 <https://doi.org/10.1242/jcs.178434>
- 793 72. Tsuji-Tamura K, Ogawa M (2018) Morphology regulation in vascular endothelial cells. *Inflamm*  
794 *Regen* 38:25. <https://doi.org/10.1186/s41232-018-0083-8>
- 795 73. Klems A, van Rijssel J, Ramms AS, et al (2020) The GEF Trio controls endothelial cell size and  
796 arterial remodeling downstream of Vegf signaling in both zebrafish and cell models. *Nat*  
797 *Commun* 2020 11:1–20. <https://doi.org/10.1038/s41467-020-19008-0>
- 798 74. Phng LK, Stanchi F, Gerhardt H (2013) Filopodia are dispensable for endothelial tip cell  
799 guidance. *Dev* 140:4031–4040. <https://doi.org/10.1242/dev.097352>
- 800 75. Wakayama Y, Fukuhara S, Ando K, et al (2015) Cdc42 mediates Bmp - Induced sprouting  
801 angiogenesis through Fmnl3-driven assembly of endothelial filopodia in zebrafish. *Dev Cell*  
802 32:109–122. <https://doi.org/10.1016/j.devcel.2014.11.024>
- 803 76. Treps L, Le Guelte A, Gavard J (2013) Emerging roles of Semaphorins in the regulation of  
804 epithelial and endothelial junctions. *Tissue Barriers* 1:e23272. <https://doi.org/10.4161/tisb.23272>

- 805 77. Meeker ND, Hutchinson SA, Ho L, Trede NS (2007) Method for isolation of PCR-ready genomic  
806 DNA from zebrafish tissues. *Biotechniques* 43:610–614. <https://doi.org/10.2144/000112619>
- 807 78. Bedell VM, Westcot SE, Ekker SC (2011) Lessons from morpholino-based screening in  
808 zebrafish. *Br Funct Genomics* 10:181–188. <https://doi.org/10.1093/bfgp/elr021>
- 809 79. Bill BR, Petzold AM, Clark KJ, et al (2009) A primer for morpholino use in zebrafish. *Zebrafish*  
810 6:69–77
- 811 80. Rougeot J, Zakrzewska A, Kanwal Z, et al (2014) RNA sequencing of FACS-sorted immune cell  
812 populations from zebrafish infection models to identify cell specific responses to intracellular  
813 pathogens. *Methods Mol Biol* 1197:261–274. [https://doi.org/10.1007/978-1-4939-1261-2\\_15](https://doi.org/10.1007/978-1-4939-1261-2_15)
- 814 81. Stahlhut C, Suárez Y, Lu J, et al (2012) miR-1 and miR-206 regulate angiogenesis by  
815 modulating VegfA expression in zebrafish. *Dev* 139:4356–4364.  
816 <https://doi.org/10.1242/dev.083774>
- 817 82. Thisse C, Thisse B (2008) High-resolution in situ hybridization to whole-mount zebrafish  
818 embryos. *Nat Protoc* 3:59–69. <https://doi.org/10.1038/nprot.2007.514>
- 819 83. Rasband W. ImageJ  
820  
821

822 **Supplemental Figure Legends:**

823

824 **S1 Fig: *sema3f* expression and *sema3fa* mutant phenotype**

825 A) Lateral view of whole-mount ISH from 26-30hpf shows *sema3fa* expression in the ventral lateral  
826 somites and *sema3fb* expression in the dorsal aorta (DA) and intersegmental arteries (ISAs). HM:  
827 Horizontal Myoseptum. B) Expression of *sema3fa* and *sema3fb* in transverse sections of the trunk at  
828 28hpf. *sema3fa* is expressed in ventral and lateral somite (arrows) while *sema3fb* is strongly  
829 expressed in the DA (arrowhead), Neural tube (nt), notochord (nc). C) Lateral confocal images of trunk  
830 vasculature (black) of 30hpf control wild type (WT), homozygous *sema3fa*<sup>ca304</sup> and *sema3fb*<sup>ca305</sup>  
831 mutant embryos with and without injection of 1ng *sema3fb*<sup>ATG-MO</sup>. Scale bar, 100  $\mu$ m. n/N = number of  
832 embryos with angiogenic defects/Total number of embryos. D) Length of ISA sprouts in WT and  
833 *sema3fa*<sup>ca304</sup> mutant and *sema3fb*<sup>ca304</sup> embryos with *sema3fb*<sup>ATG-MO</sup> at 30 hpf; N= 2, 6 embryos per  
834 group: WT (30 ISAs, mean 109 $\pm$ 7  $\mu$ m), *sema3fa*<sup>ca304</sup> ( 28 ISAs, mean of 106 $\pm$ 9  $\mu$ m), and *sema3fa*<sup>ca304</sup>  
835 + *sema3fb*<sup>ATG-MO</sup> (30 ISAs, mean 91 $\pm$ 17  $\mu$ m), \*\*\*\*p<0.0001..E) Length of ISA sprouts in WT,  
836 *sema3fb*<sup>ATG-MO</sup> morphants and *sema3fb*<sup>ca305</sup> knockdown embryos with *sema3fb*<sup>ATG-MO</sup> at 30 hpf; N= 1,  
837 WT=2 embryos (25 ISAs, mean 105 $\pm$ 7  $\mu$ m), *sema3fb*<sup>ATG-MO</sup> = 5 embryos ( 25 ISAs, mean of 78 $\pm$ 20  
838  $\mu$ m), and *sema3fb*<sup>ca305</sup> + *sema3fb*<sup>ATG-MO</sup> 5 embryos ( 25 ISAs, mean 87 $\pm$ 15  $\mu$ m), \*\*\*\*p<0.0001. One-  
839 Way ANOVA Tukey's multiple comparisons test. Error bars =  $\pm$ SD

840

841 **S2 Fig: Loss of *sema3fb* angiogenic deficits are independent of blood flow**

842 A) Confocal lateral images of laminin-stained embryos at 30hpf. Tg(kdrl:mCherry) endothelium (red)  
843 and laminin (green). Embryos derived from a heterozygous *sema3fb*<sup>ca305/+</sup> incross. B) Quantification of  
844 the length of ISA sprouts at 30hpf, N= 1: wild type (WT) (40 ISAs, 4 embryos, mean of 102 $\pm$ 1  $\mu$ m<sup>2</sup>),  
845 *sema3fb*<sup>ca305/+</sup> (120 ISAs, 12 embryos, mean of 90 $\pm$ 8  $\mu$ m<sup>2</sup>), and *sema3fb*<sup>ca305</sup> (150 ISAs, 15 embryos,  
846 mean of 90 $\pm$ 14  $\mu$ m<sup>2</sup>). C) Confocal lateral images of the trunk endothelium (black) in blood flow-

847 stopped *tnnt2*ATG-MO injected wild type siblings (WT) and *sema3fb*<sup>ca305</sup> mutants. DLAV gaps (blue  
848 asterisks) and truncated ISAs sprouts (yellow arrowheads) are marked. Scale bar, 100µm. D) Length  
849 of ISA sprouts at 30 hpf, N= 3: WT (80 ISAs, 8 embryos, mean length of 106±3 µm), WT + *tnnt2a*<sup>ATG-</sup>  
850 <sup>MO</sup> (100 ISAs, 10 embryos, mean 98±8.4 µm), *sema3fb*<sup>ca305</sup> (80 ISAs, 8 embryos, mean 86±17 µm),  
851 and *sema3fb*<sup>ca305</sup> + *tnnt2a*<sup>ATG-MO</sup> (100 ISAs, 10 embryos, mean 85±22 µm). E) Percentage of ISAs  
852 connected at DLAV at 30 hpf, N= 3: WT (mean 82±9% connected), WT + *tnnt2a*<sup>ATG-MO</sup> (mean 86±7%  
853 connected), *sema3fb*<sup>ca305</sup> (80 ISAs, 8 embryos, mean 54±15% connected), and *sema3fb*<sup>ca305</sup> +  
854 *tnnt2a*<sup>ATG-MO</sup> (mean 54±16% connected). F ) Quantification of width of DA in 30 hpf embryos, N= 3: WT  
855 (8 embryos, 5 measurements per embryo/n= 40 total, mean width of 18±3 µm), WT + *tnnt2a*ATG-MO  
856 (10 embryos, 5 measurements per embryo/n= 50 total, mean 9±1 µm), *sema3fb*<sup>ca305</sup> (8 embryos, 5  
857 measurements per embryo/n=40 total, mean 11±3 µm), and *sema3fb*<sup>ca305</sup> + *tnnt2a*<sup>ATG-MO</sup> (10 embryos,  
858 5 measurements per embryo/n=50 total, mean 10±1 µm). G) Quantification of width of PCV in 30 hpf  
859 embryos, N= 3: WT (n=40, mean width of 22±3 µm), WT + *tnnt2a*<sup>ATG-MO</sup> (n=50, mean 19±4 µm),  
860 *sema3fb*<sup>ca305</sup> (n=40, mean 20±3 µm), and *sema3fb*<sup>ca305</sup> + *tnnt2a*<sup>ATG-MO</sup> (n =50, mean 19±4 µm). 2-Way  
861 ANOVA Tukey's multiple comparisons test, \*\*\*\* means p<0.001. Error bars = ±SD.

862

### 863 **S3 Fig: *Sema6b* mutants recover by 48 hpf**

864 A) Representative Lateral confocal images of trunk vasculature (black) of 48 hpf control wild type  
865 (WT), heterozygous *sema3fb*<sup>ca305/+</sup> and homozygous *sema3fb*<sup>ca305</sup> mutant embryos with no obvious  
866 differences in vessel morphology or Segmental vessel (Se) connections. Scale bar, 100 µm. SIV =  
867 sub-intestinal vein (plexus), DA = Dorsal Aorta, PCV= Post Caudal Vein, CA = Caudal Artery, CV =  
868 Caudal Vein. N =2, n : WT= 5, *sema3fa*<sup>ca305/+</sup> = 5, and *sema3fb*<sup>ca305</sup> = 7.

869

### 870 **S4 Fig: *sema3fb* morphant endothelial nuclei phenotype**

871 A) Lateral confocal timelapse images of time-lapse images in 25.5-28.5 hpf double transgenic  
872 Tg(kdrl:mCherry;fli1a:nEGFP) endothelial cells (magenta) and nuclei (white). The horizontal  
873 myoseptum (green dashed line) is noted to highlight ISA growth over time. Scale bar, 50  $\mu\text{m}$ . B)  
874 During the 25 - 26 hpf interval there is no significant difference in speed between wild type and mutant  
875 embryos, see Supplemental Table 2 for details. C) Lead angioblast mean distance from DA at 25 hpf:  
876 WT=  $44.47 \pm 8.36 \mu\text{m}$  and *sema3fb*<sup>ca305</sup> =  $43.14 \pm 6.84 \mu\text{m}$ , p = 0.609. D) Lead angioblast at 26 hpf mean  
877 distance from DA: WT=  $55.12 \pm 14.06 \mu\text{m}$  and *sema3fb*<sup>ca305</sup> =  $47.18 \pm 5.75 \mu\text{m}$ , p = 0.572. C-D) N = 1:  
878 WT = 4 embryos (20 ISAs) and *sema3fb*<sup>ca305</sup> = 3 embryos (15 ISAs), Unpaired t-test with Welch's  
879 correction. E) Lateral confocal images of double transgenic Tg(kdrl:mCherry;fli1a:nEGFP) endothelium  
880 (red) and endothelial cell nuclei (green). DLAV gaps (blue asterisks) and truncated ISAs sprouts (white  
881 arrowheads) are noted. Embryos derived from a heterozygous *sema3fb*<sup>ca305/+</sup> incross. Scale bar, 100  
882  $\mu\text{m}$ . G) Quantification of the number of endothelial cell nuclei per ISAs in 30 hpf embryos, N= 2: WT (6  
883 embryos, mean of 3 nuclei/ISA), and *sema3fb*MO (7 embryos, mean of 3 nuclei /ISA). Unpaired t-test  
884 with Welch's correction, p= 0.17. G) Quantification of the average area of endothelial cell nuclei per  
885 ISAs in 30 hpf embryos, N= 3: WT (60 ISAs, 6 embryos, mean of  $42 \pm 16 \mu\text{m}^2$ ), and *sema3fb*MO (70  
886 ISAs, 7 embryos, mean  $61 \pm 19 \mu\text{m}^2$ ). Unpaired t-test with Welch's correction, \*\*\*\*p<0.0001. Error bars  
887 =  $\pm$ SD

888

889 **S5 Fig: *sema3fb* mutants display aberrant and persistent filopodia**

890 A) Representative still images of single-cell expression of fli1ep: Lifeact-EGFP (green) in ISA  
891 endothelial cells from 28-30hpf wildtype and *sema3fb*<sup>ca305</sup> embryo time-lapse imaging. A dashed white  
892 line represents the horizontal myoseptum and selected areas for filopodia counts are highlighted in  
893 white boxes. B) Quantification of number Lifeact-EGFP positive filopodia on ISA at 28hpf from  
894 embryos of the indicated genotypes. Unpaired t-test, p=0.3566. C) Quantification of number Lifeact-  
895 EGFP positive filopodia on ISA at 29hpf from embryos of the indicated genotypes. Unpaired t-test, p=  
896 0.0029. D) Quantification of number Lifeact-EGFP positive filopodia on ISA at 30hpf from embryos of

897 the indicated genotypes. N= 3 for each quantification: WT (14 ISAs, 6 embryos, mean of 3  
898 filopodia/ISA) and homozygous *sema3fb*<sup>ca305</sup> (18 ISAs, 7 embryos, mean of 8 filopodia/ISA). Unpaired  
899 t-test, p=0.0002.

900

## 901 **S6 Fig: Interactions between VEGFR inhibitor and sprouting in *sema3fb* mutants**

902 A) A model of signaling pathways that regulate angiogenic sprouting, highlighting key genes  
903 controlling tip and stalk cell identity. B) Quantification of Tg(kdrl:mCherry) transgene expression levels  
904 in wild type and *sema3fb*<sup>ca305</sup> ISAs at 30hpf. N=3: wild type (n=13 embryos, average of 6500 a.u.) and  
905 *sema3fb*<sup>ca305</sup> (n=14 embryos, average of 8400 a.u.). T-test with Welches correction, \*p=0.0186, a.u. =  
906 arbitrary unit of intensity. C). B) Fluorescent HCR in situ for *vegfr2* and *sflt1* RNA transcripts in whole-  
907 mount wild type and embryos *sema3fb*<sup>ca305</sup> embryos fixed at 30 hpf. D) Whole-mount Immunostaining  
908 for phosphoERK (pERK) in WT and *sema3fb*<sup>ca305</sup> embryos fixed at 30 hpf. E) Lateral confocal images  
909 of the trunk vasculature Tg(kdrl:mCherry) (white) in embryos treated with 0.5 μM SU5416 from 20hpf-  
910 30hpf. DLAV gaps (blue asterisks) and ISA truncated sprouts (yellow dashed line at the level of  
911 horizontal myoseptum are indicated. Scale bar, 100 μm. F) Quantification of ISA sprout length in 30  
912 hpf embryos treated with 0.5 μM SU5416, N= 1: WT + DMSO (25 ISAs, 5 embryos, mean of 107±8  
913 μm), WT + 0.5μM SU5416 (25 ISAs, 5 embryos, mean of 50±14 μm), *sema3fb*<sup>ca305</sup> + DMSO (30 ISAs,  
914 6 embryos, mean of 82±17 μm), and *sema3fb*<sup>ca305</sup> +0.5μM SU5416 (30 ISAs, 6 embryos, mean of  
915 82±19 μm). G) Percentage of ISA sprouts connected at DLAV in 30 hpf embryos treated with 0.5 μM  
916 SU5416, N= 1: WT + DMSO (25 ISA-DLAV, 5 embryos, mean 78% of ISA-DLAV/embryo), WT + 0.5  
917 μM SU5416 (25 ISA-DLAV, 5 embryos, mean of 78%), *sema3fb*<sup>ca305</sup> + DMSO (30 ISA-DLAV, 6  
918 embryos, mean of 51%), and *sema3fb*<sup>ca305</sup> + 0.5 μM SU5416 (30 ISA-DLAV, 6 embryos, mean of  
919 82±19%). Error bars = ±SD. H) Lateral confocal images of the trunk vasculature Tg(kdrl:mCherry)  
920 (white) in embryos treated with low doses of DMH4 μM SU5416 from 20hpf-30hpf. ISA truncated  
921 sprouts (yellow dashed line at the level of horizontal myoseptum are indicated. Scale bar, 50 μm. I)  
922 Quantification of length of ISA sprouts in 30 hpf embryos treated with 15 μM DMH4, J) Quantification

923 of length of ISA sprouts in 30 hpf embryos treated with 25  $\mu$ M DMH4. I-J) N=1; WT+ DMSO n= 3, 15  
924 ISAs, average (ave.)  $102\pm 9$   $\mu$ m ; WT+  $\mu$ M DMH4 n= 2, 10 ISA, ave.  $17\pm 17$   $\mu$ m; WT+ 25  $\mu$ M DMH4 n=  
925 3, 15 ISAs, ave.  $7\pm 8$   $\mu$ m. *sema3fb*<sup>ca305</sup> + DMSO = 3, 15 ISA, ave.  $87\pm 18$   $\mu$ m, *sema3fb*<sup>ca305</sup> + 15  $\mu$ M  
926 DMH4 n = 2, 10 ISA, ave.  $40\pm 16$   $\mu$ m; *sema3fb*<sup>ca305</sup> + 25  $\mu$ M DMH4 n = 3, 15 ISA,  $32\pm 13$   $\mu$ m. One-Way  
927 ANOVA Tukey's multiple comparisons test, \* means  $\neg\neg p = 0.012$ , \*\*\*\*\* $p = < 0.0001$ . Error bars =  $\pm$ SD.

928

## 929 **SI Tables Legend**

930 S1 Table. ISA length at different time intervals

931 S2 Table. Angioblast migration distance and speed

932 S3 Table. Quantitative PCR mean fold change data

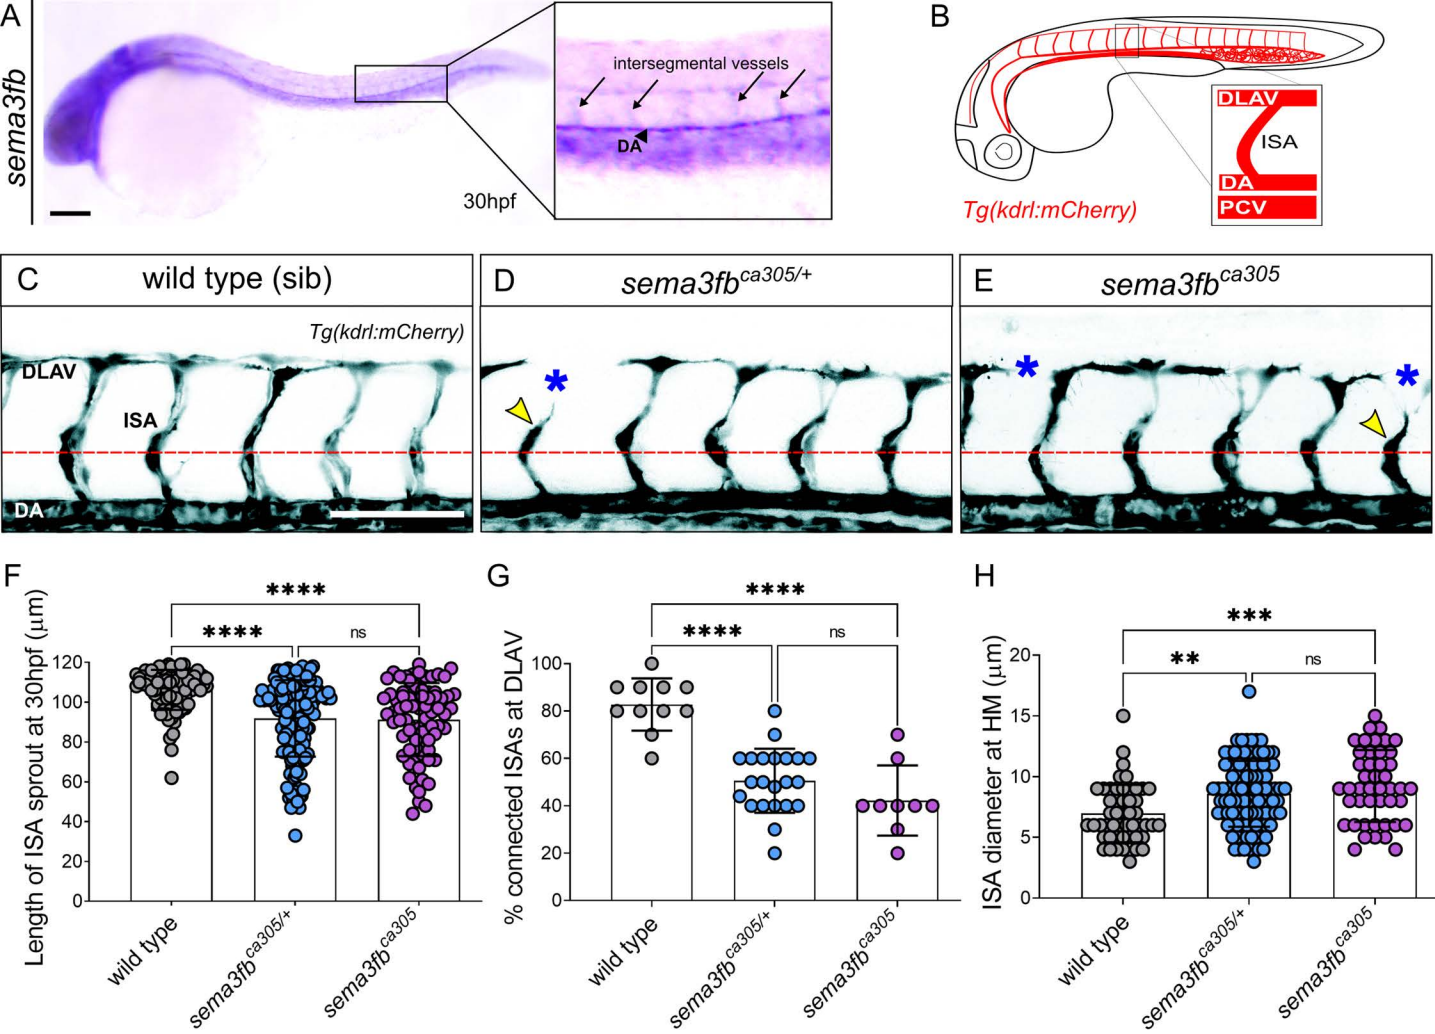



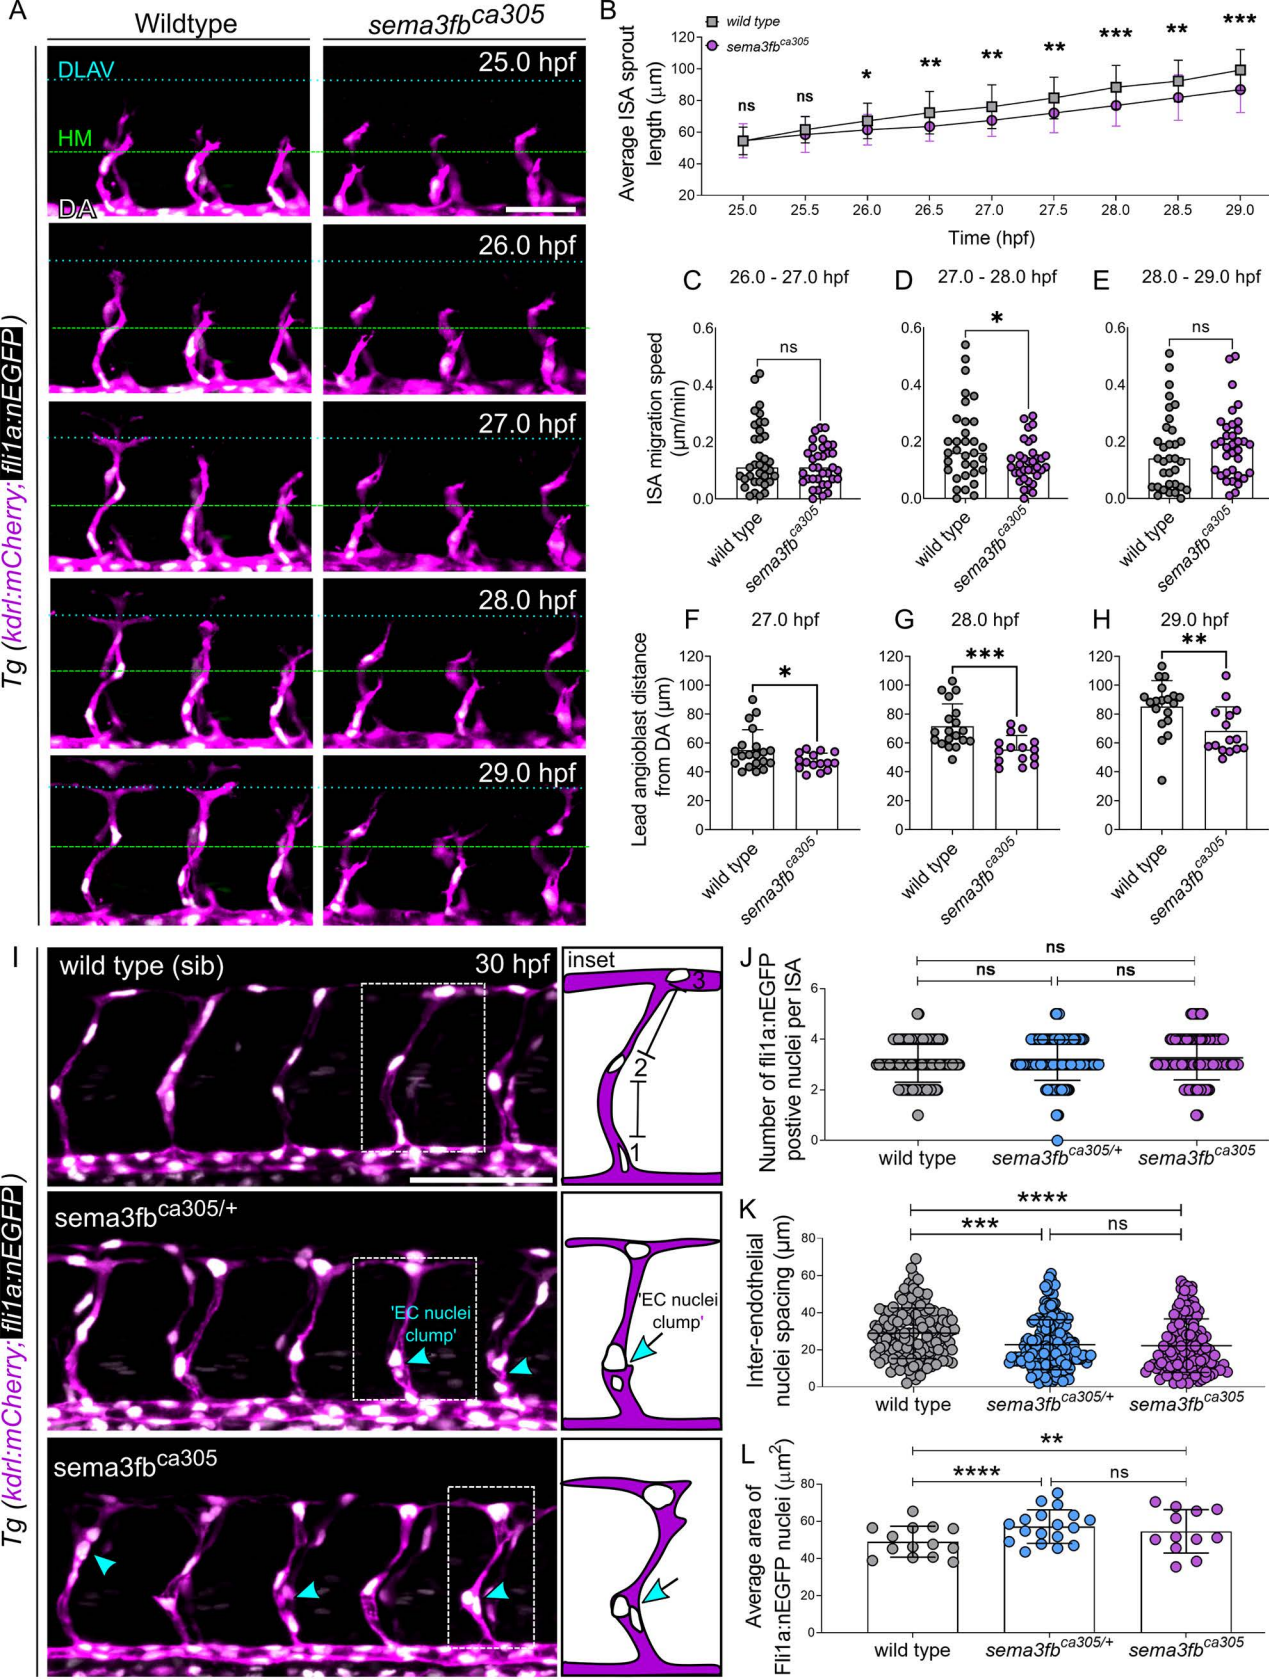

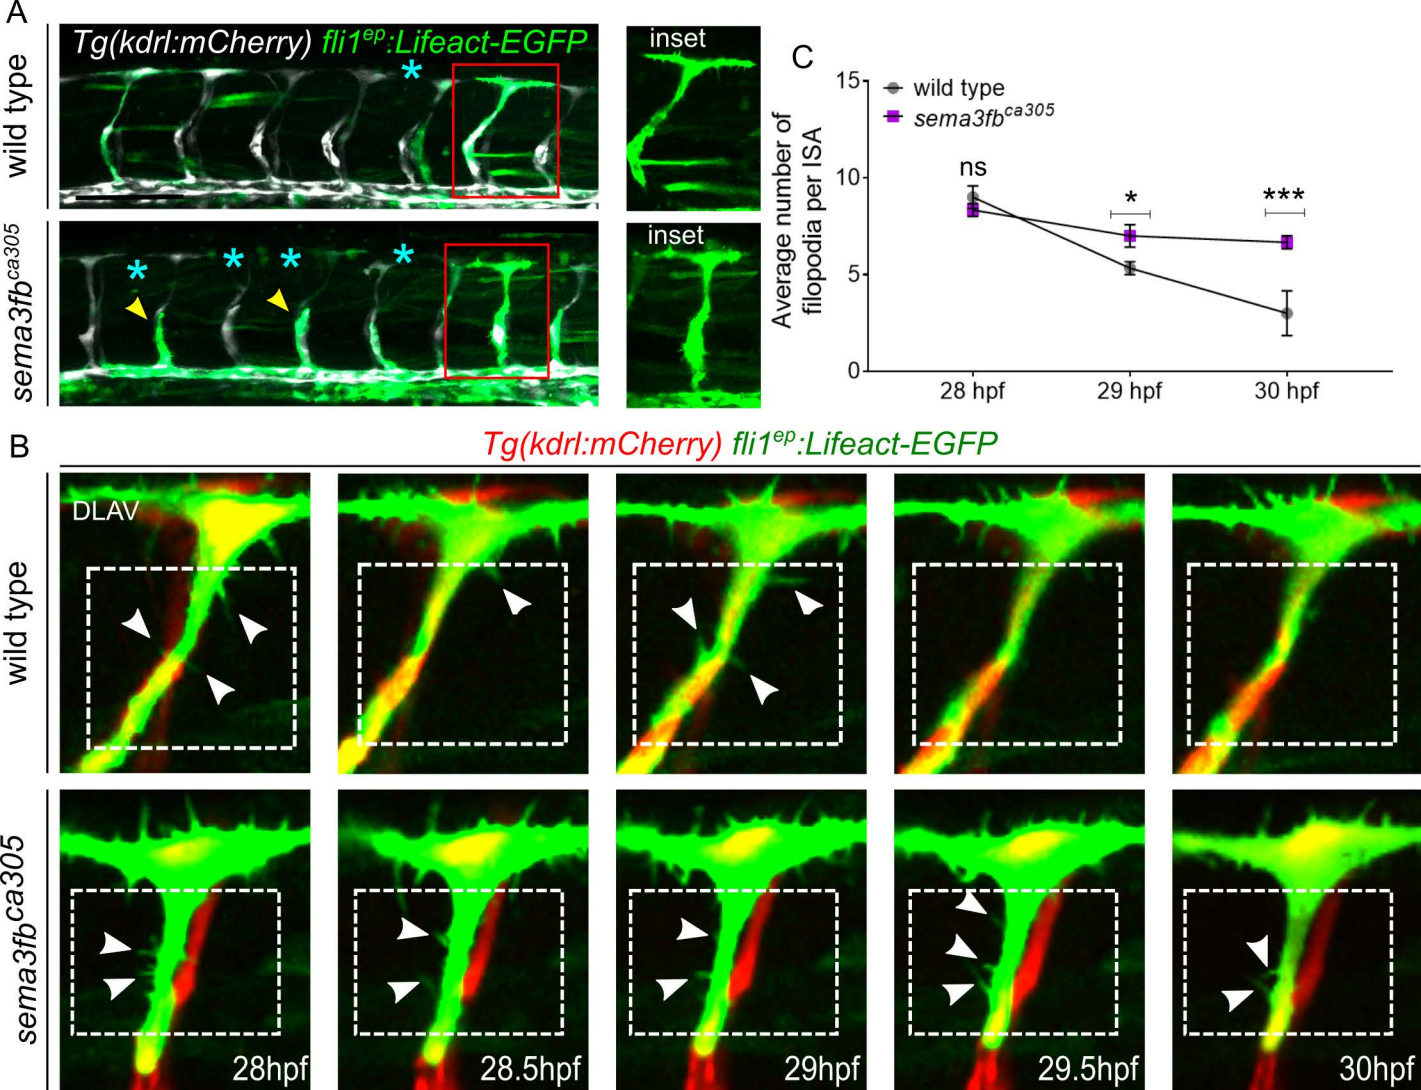

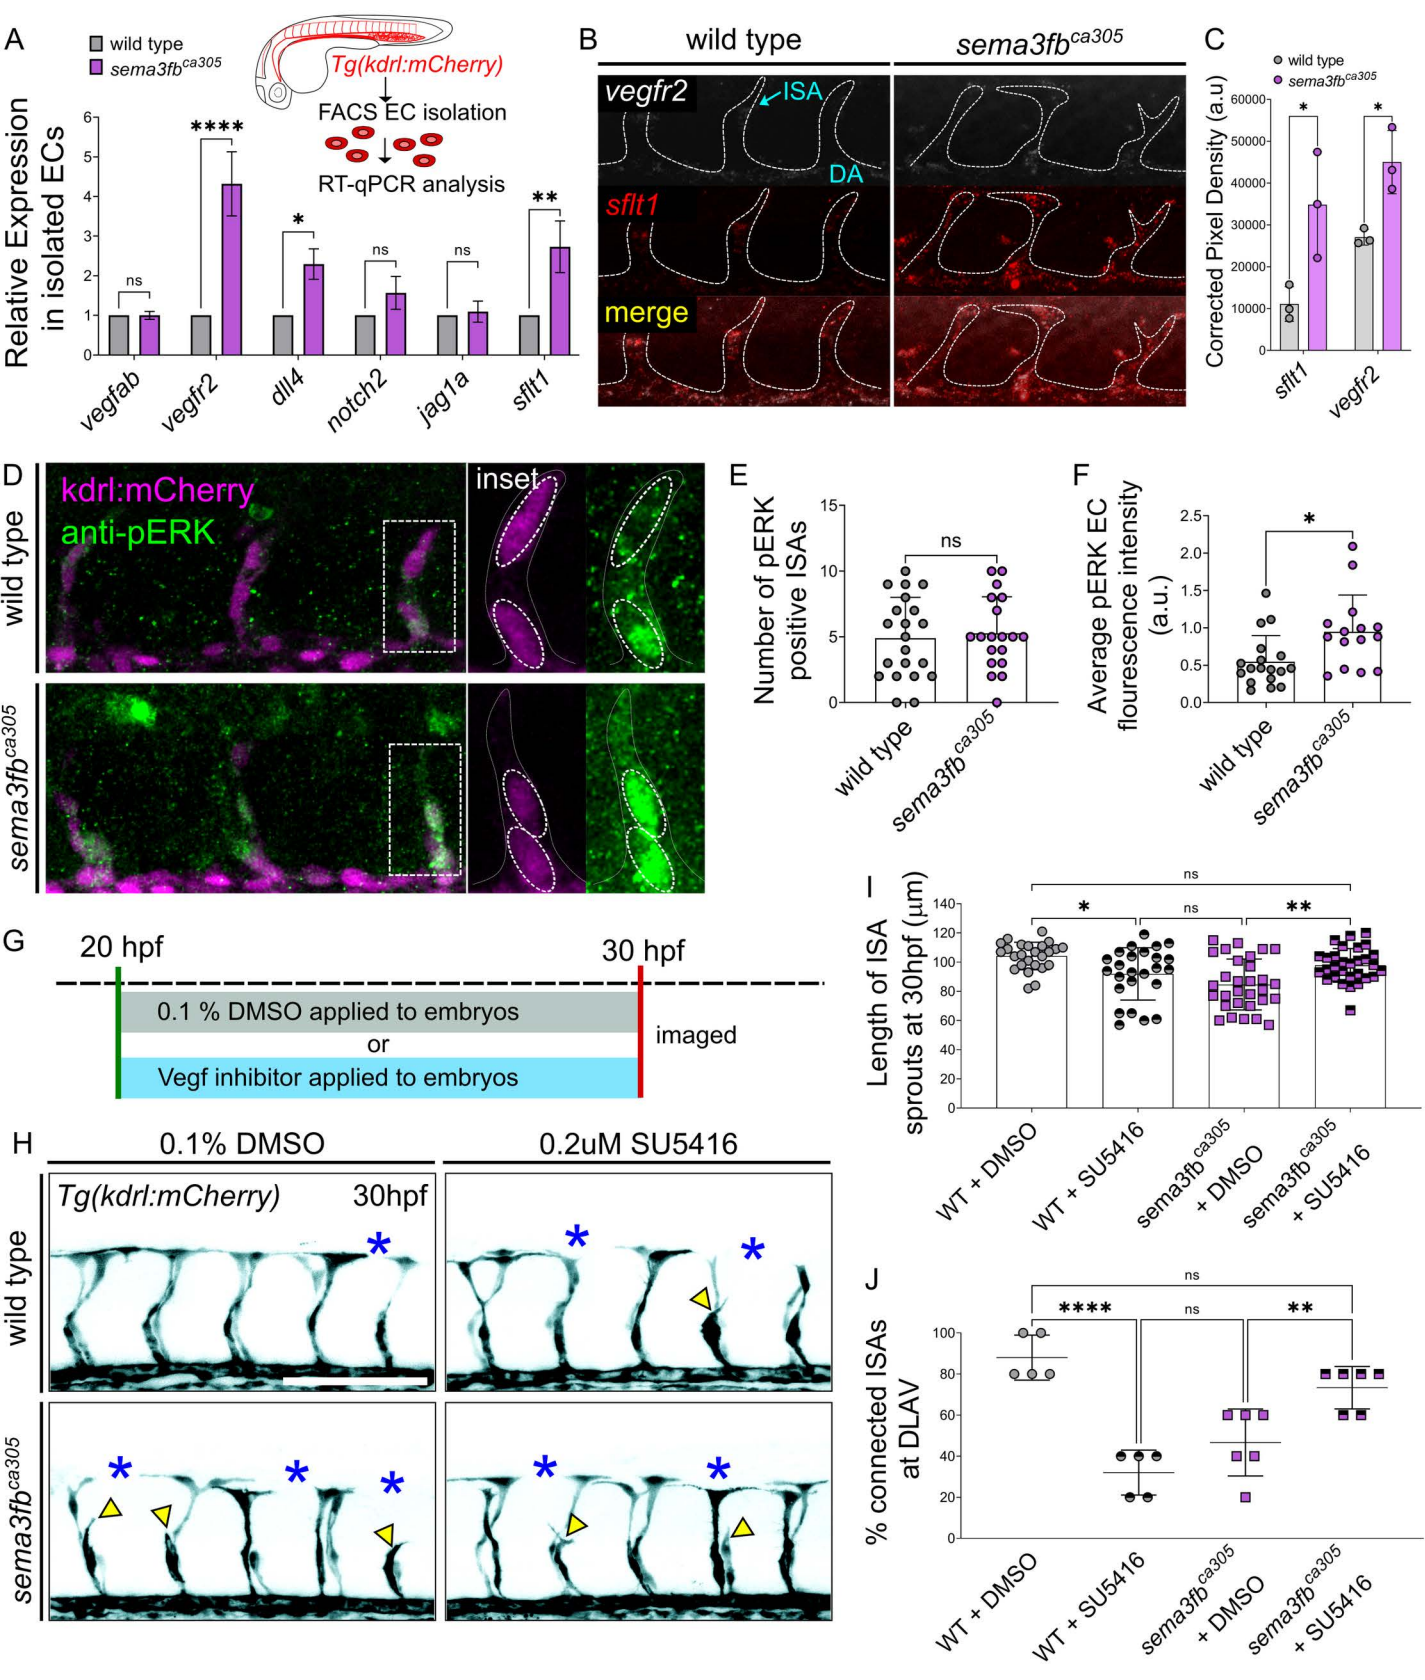

wild type

Vegf gradient

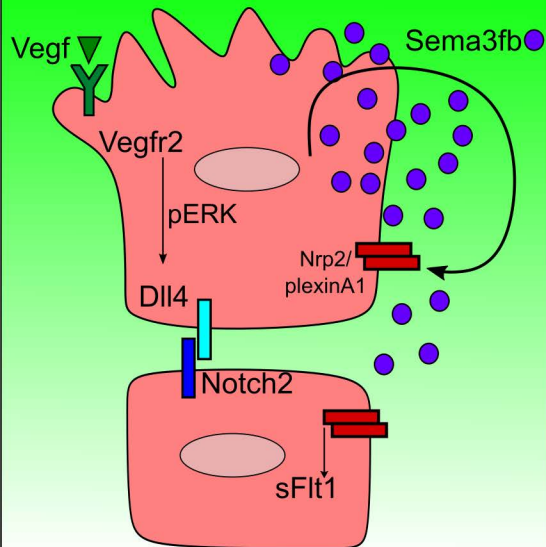

sema3fb -/-

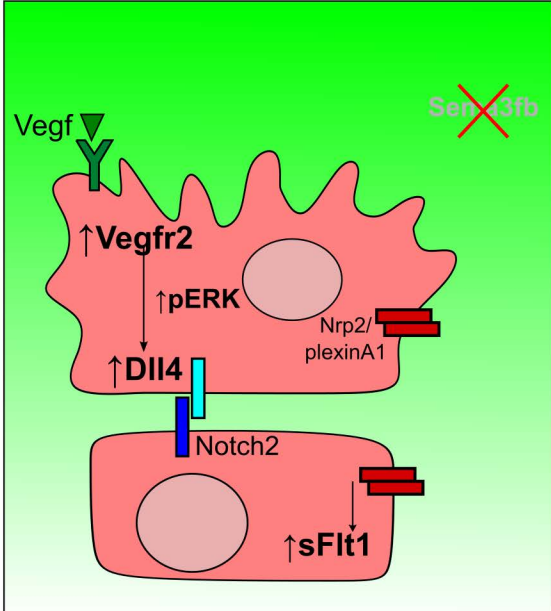

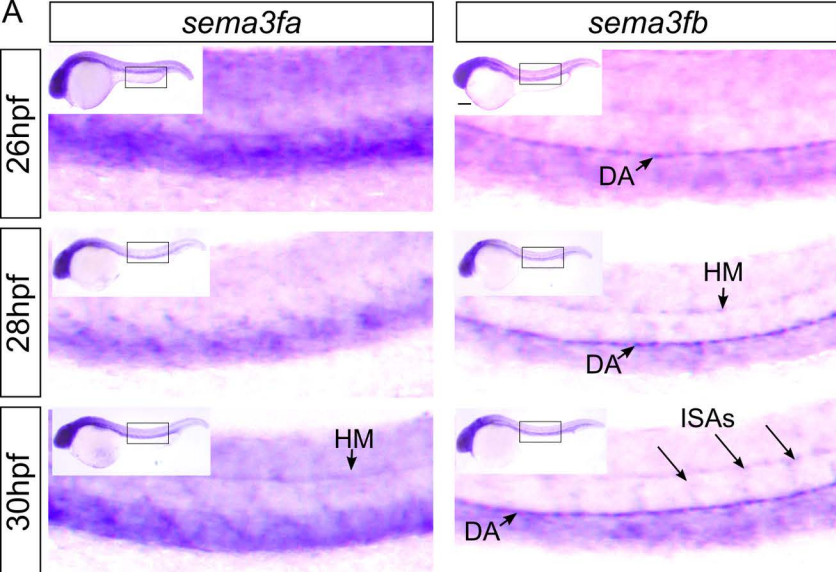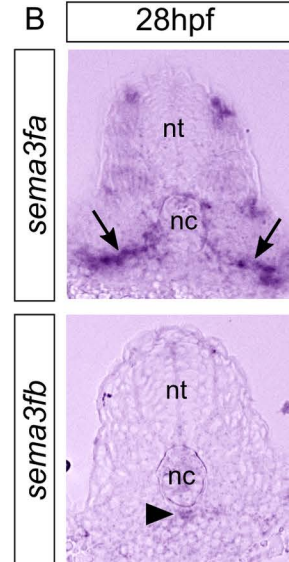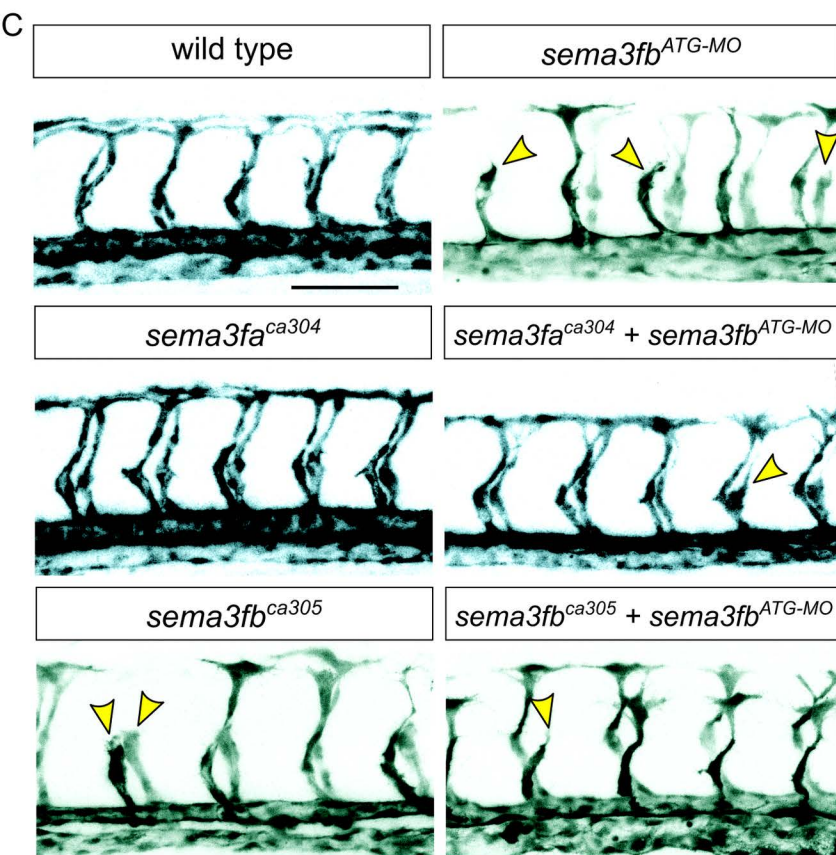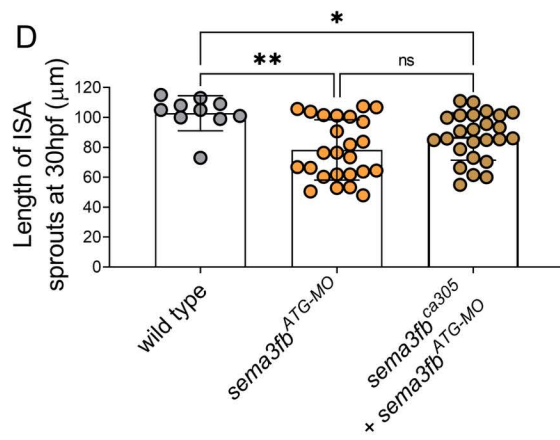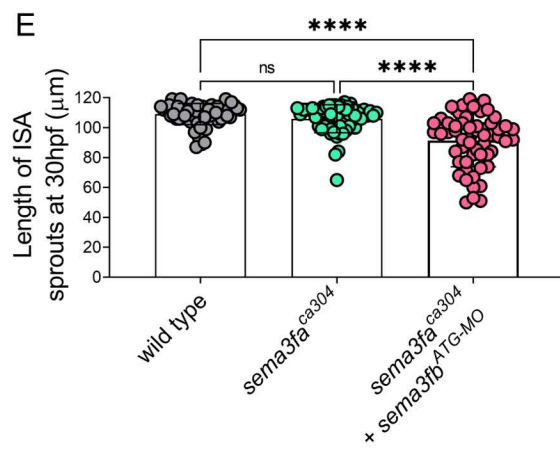

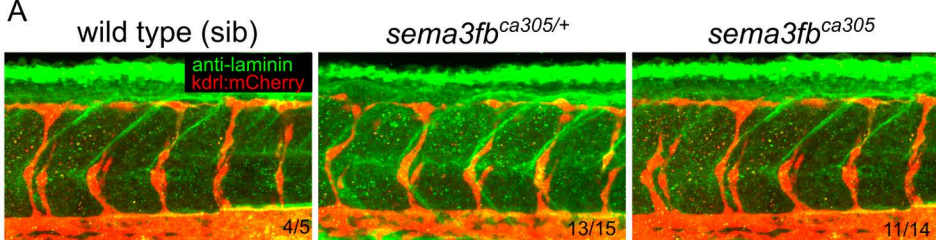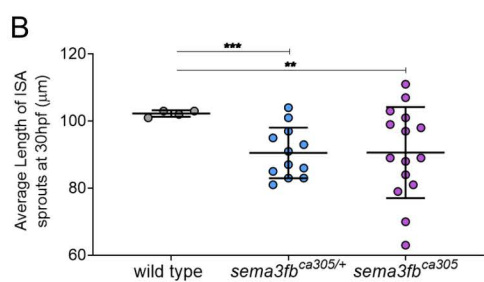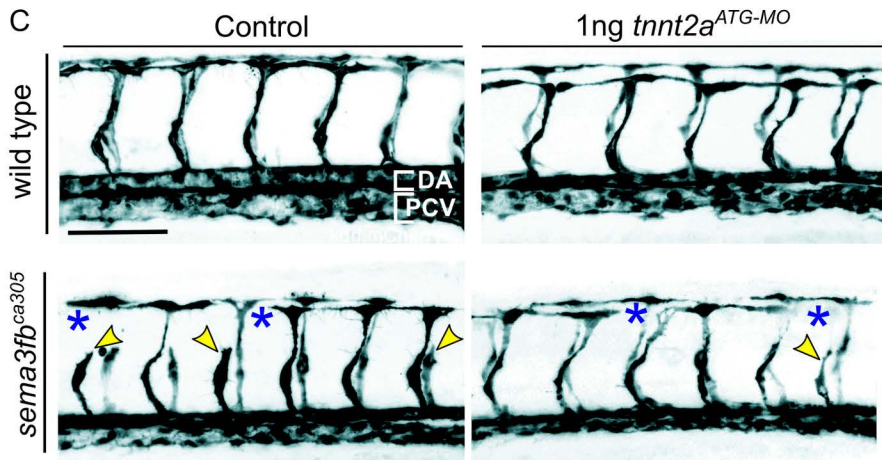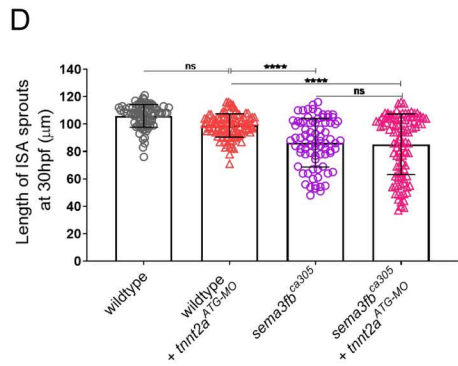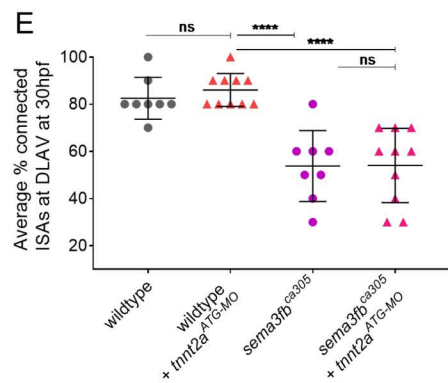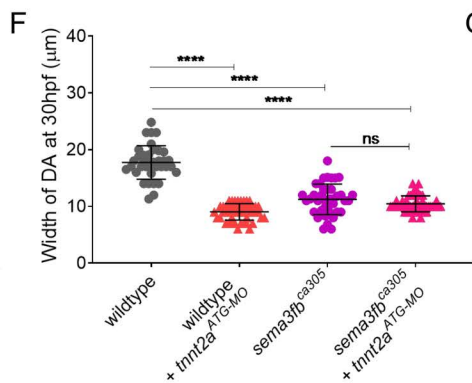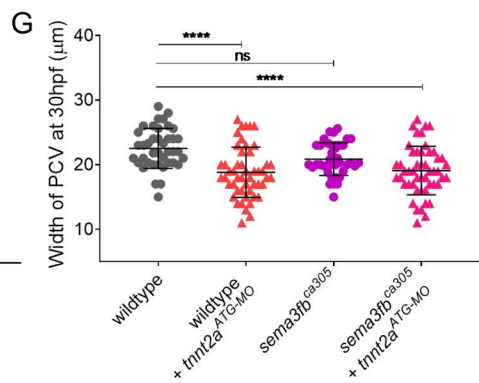

A

48hpf

inset

wildtype (sib)

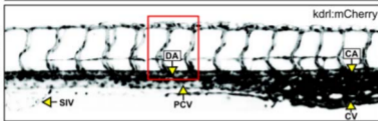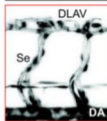*sema3fb*<sup>ca305/+</sup>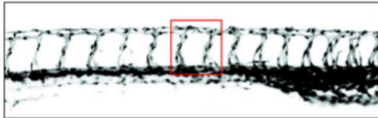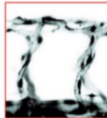*sema3fb*<sup>ca305</sup>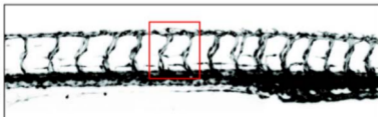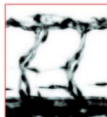

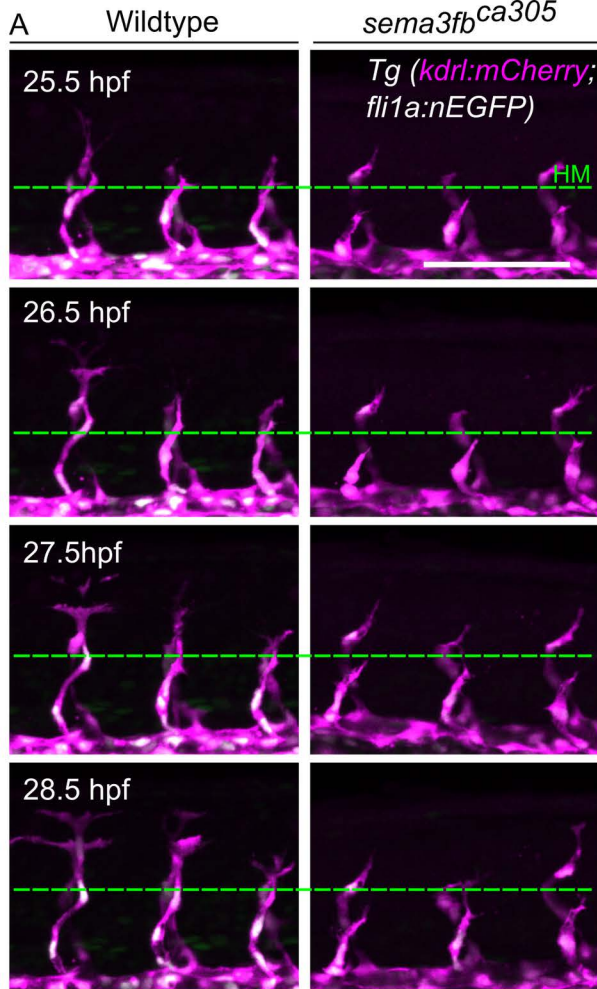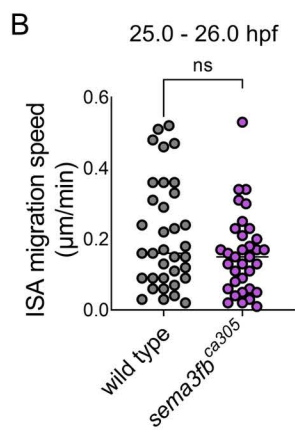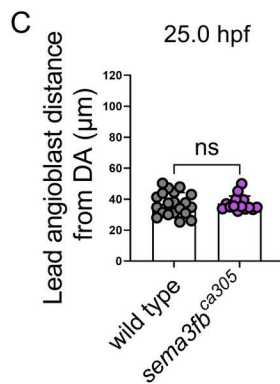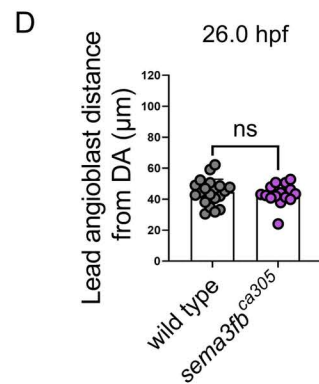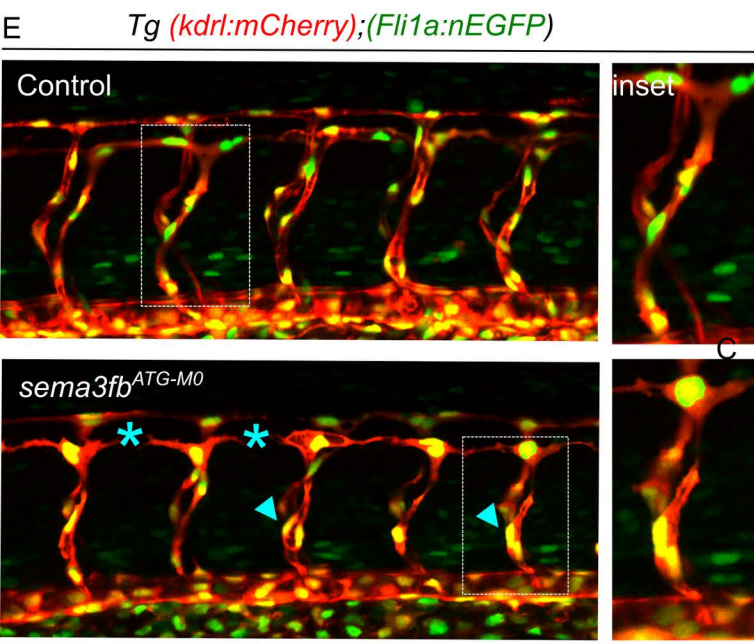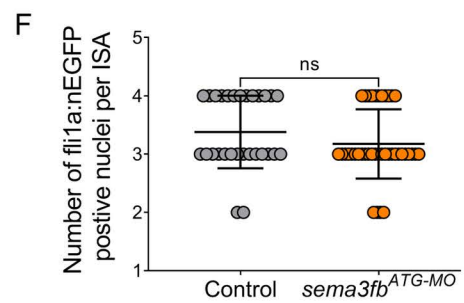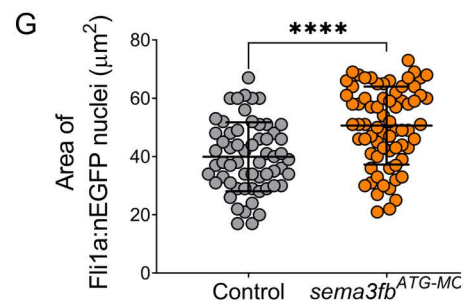



A

wild type

*sema3fb*<sup>ca305</sup>Tg(*kdr*:mCherry) *fil1*<sup>ep</sup>:Lifeact-EGFP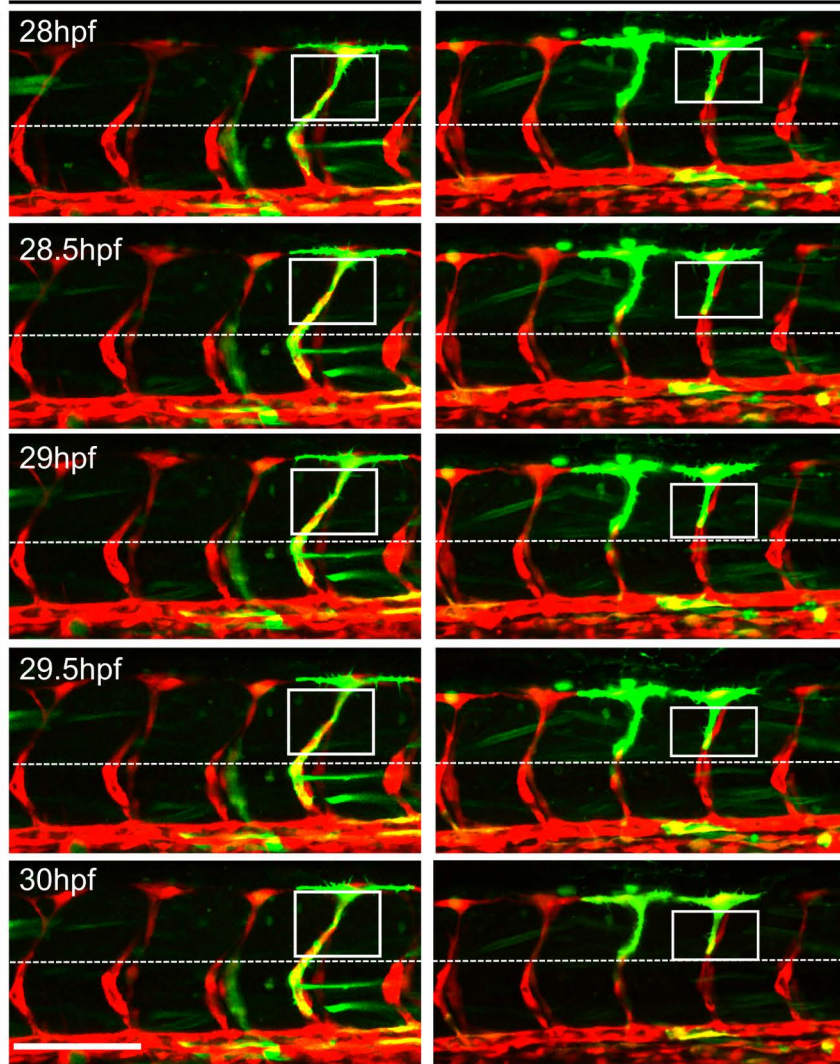

B

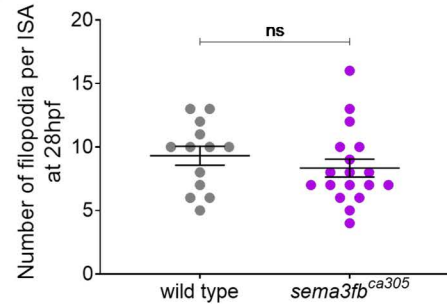

C

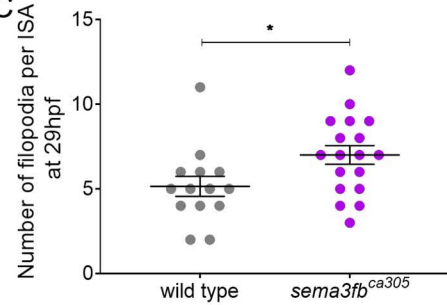

D

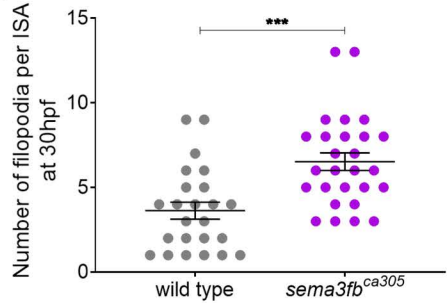

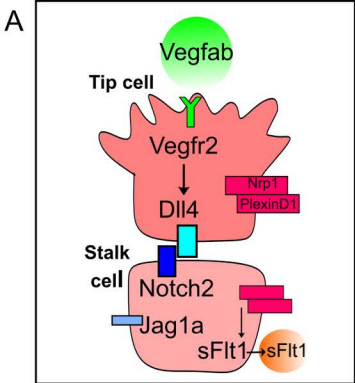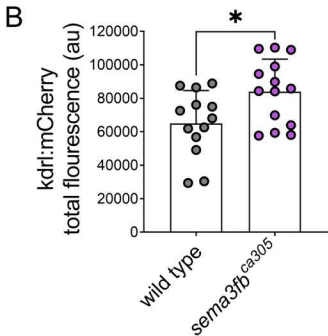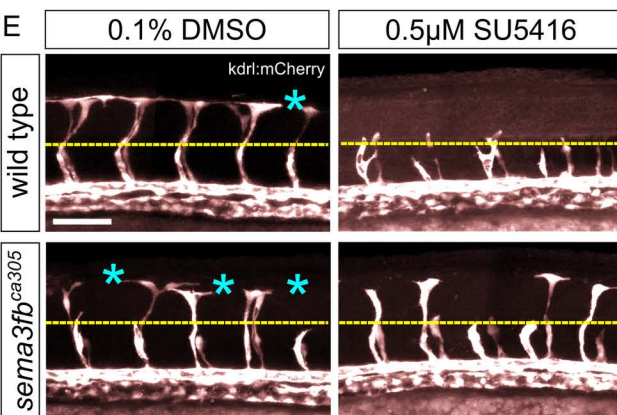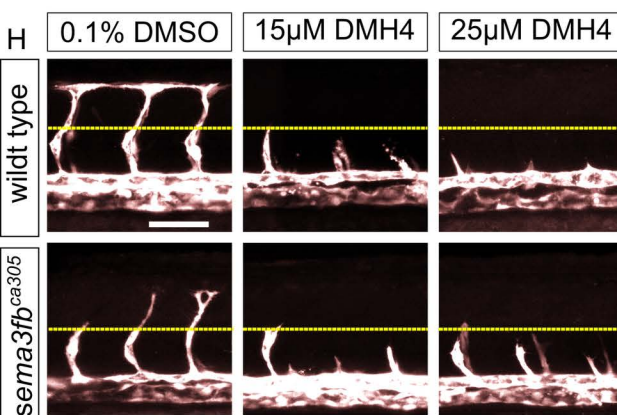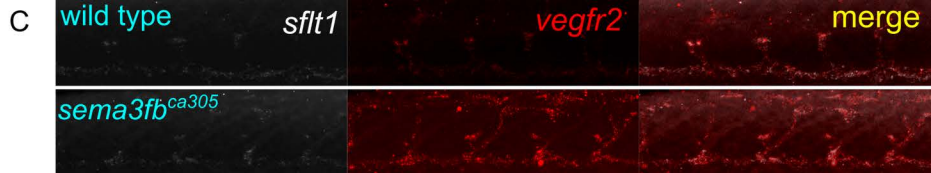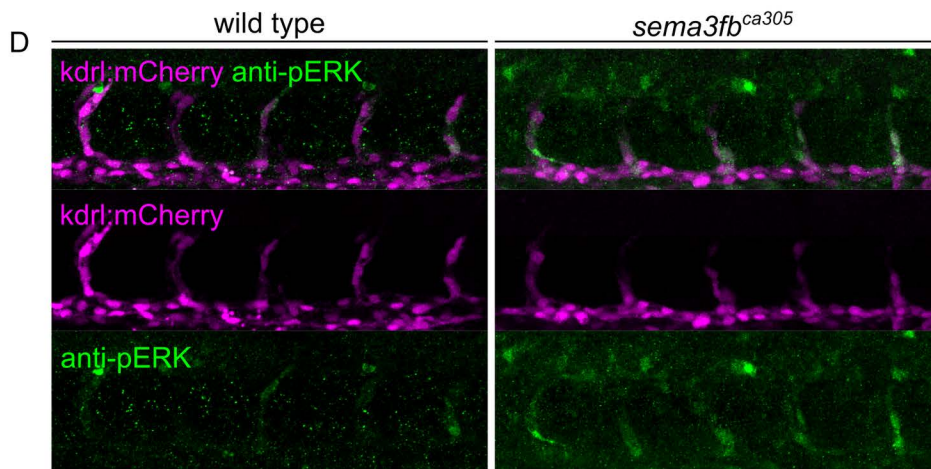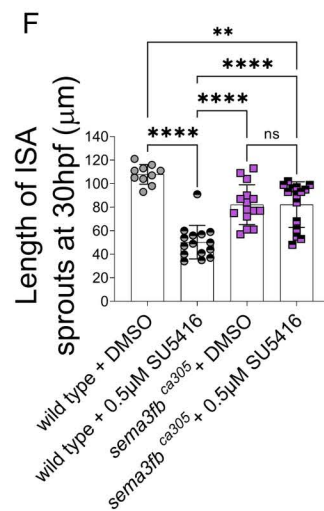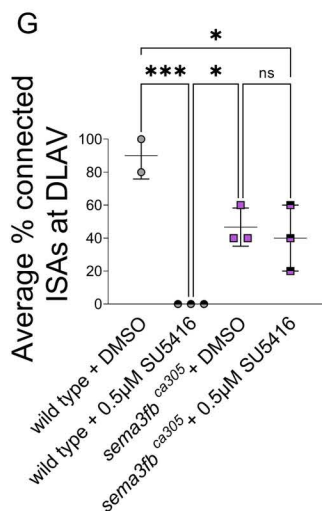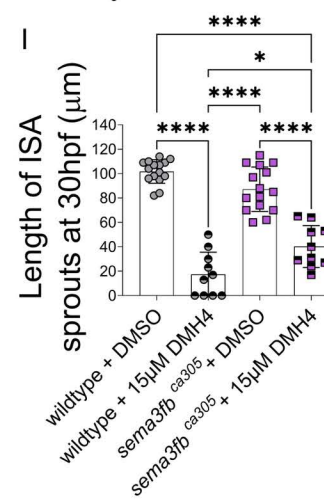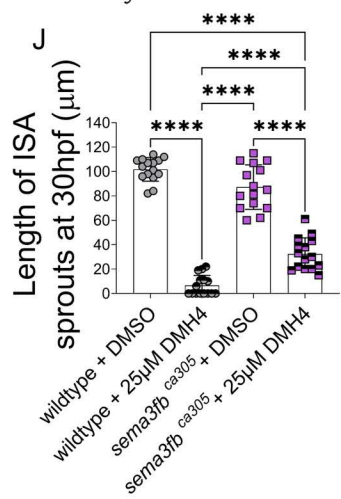

| Time (hpf) | ISA Length ( $\mu\text{m}$ ) |       |    |               |       |    | Length Differenc | t.tests (p value) |    |
|------------|------------------------------|-------|----|---------------|-------|----|------------------|-------------------|----|
|            | Wildtype                     |       |    | sema3fb ca305 |       |    |                  |                   |    |
|            | mean                         | sd    | n  | mean          | sd    | n  |                  |                   |    |
| 25.0       | 54.95                        | 9.24  | 35 | 54.51         | 11.16 | 35 | 0.44             | 0.474             | ns |
| 25.5       | 61.49                        | 8.34  | 35 | 58.97         | 12.06 | 35 | 2.52             | 0.262             | ns |
| 26.0       | 67.84                        | 11.29 | 35 | 63.15         | 12.15 | 35 | 4.69             | 0.081             | ns |
| 26.5       | 71.90                        | 13.70 | 35 | 66.67         | 12.16 | 35 | 5.23             | 0.023             | *  |
| 27.0       | 75.39                        | 14.14 | 33 | 69.37         | 13.29 | 35 | 6.02             | 0.02              | *  |
| 27.5       | 80.96                        | 13.55 | 33 | 73.84         | 14.96 | 35 | 7.12             | 0.03              | *  |
| 28.0       | 87.62                        | 13.99 | 33 | 78.37         | 14.89 | 35 | 9.25             | 0.008             | ** |
| 28.5       | 91.71                        | 13.19 | 33 | 83.11         | 16.13 | 35 | 8.60             | 0.007             | ** |
| 29.0       | 97.35                        | 13.22 | 33 | 89.10         | 16.38 | 35 | 8.25             | 0.024             | *  |

S1 Table. ISA length at different time intervals

| Interval (hpf) | ISA migration distance ( $\mu\text{m}$ ) |      |    |               |      |    | ISA migration speed ( $\mu\text{m}/\text{min}$ ) |      |               |      | t.tests (p value) |    |
|----------------|------------------------------------------|------|----|---------------|------|----|--------------------------------------------------|------|---------------|------|-------------------|----|
|                | Wildtype                                 |      |    | sema3fb ca305 |      |    | Wildtype                                         |      | sema3fb ca305 |      |                   |    |
|                | mean                                     | sd   | n  | mean          | sd   | n  | mean                                             | sd   | mean          | sd   |                   |    |
| 25.0-26.0      | 12.33                                    | 8.88 | 35 | 7.91          | 6.19 | 35 | 0.21                                             | 0.15 | 0.13          | 0.10 | 0.520             | ns |
| 26.0-27.0      | 9.06                                     | 6.95 | 35 | 7.1           | 4.21 | 35 | 0.15                                             | 0.12 | 0.12          | 0.07 | 0.157             | ns |
| 27.0-28.0      | 11.43                                    | 8.19 | 33 | 7.56          | 4.33 | 35 | 0.19                                             | 0.14 | 0.13          | 0.07 | 0.020             | *  |
| 28.0-29.0      | 9.83                                     | 8.25 | 33 | 11.2          | 7.17 | 35 | 0.16                                             | 0.14 | 0.19          | 0.12 | 0.461             | ns |

S2 Table. Angioblast migration distance and speed

| Normalized Gene Expression | Wildtype | sema3fb ca305 |      |
|----------------------------|----------|---------------|------|
|                            |          | mean          | SD   |
| <i>kdr1</i>                | 1        | 4.32          | 0.81 |
| <i>vegfab</i>              | 1        | 1.00          | 0.10 |
| <i>jag1a</i>               | 1        | 1.10          | 0.27 |
| <i>dll4</i>                | 1        | 2.30          | 0.38 |
| <i>notch2</i>              | 1        | 1.57          | 0.42 |
| <i>sflt1</i>               | 1        | 2.73          | 0.65 |

S3 Table. Quantitative PCR mean fold change data
